# Supplementary material for: The Keys to Classroom Management.
Source: Springer Nature journal article supplement (doi:10.1038/s41586-020-2923-3), 2000-01-01
Supplement: 41586_2020_2923_MOESM1_ESM.pdf [file 41586_2020_2923_MOESM1_ESM.pdf]

**Supplementary information**

---

**Mobility network models of COVID-19  
explain inequities and inform reopening**

---

In the format provided by the  
authors and unedited

# Contents

|                                                                                                                  |           |
|------------------------------------------------------------------------------------------------------------------|-----------|
| <b>Supplementary Methods</b>                                                                                     | <b>3</b>  |
| <b>1 Comparison of Google and SafeGraph mobility data</b>                                                        | <b>3</b>  |
| <b>2 Sensitivity analyses and robustness checks</b>                                                              | <b>4</b>  |
| 2.1 Time-varying base transmission rate . . . . .                                                                | 4         |
| 2.2 Modifying the parametric form for POI transmission rates . . . . .                                           | 5         |
| 2.3 Stochastic sampling of confirmed cases . . . . .                                                             | 6         |
| 2.4 Model calibration metrics . . . . .                                                                          | 6         |
| 2.5 Parameter identifiability . . . . .                                                                          | 8         |
| <b>3 Estimating the mobility network from SafeGraph data</b>                                                     | <b>8</b>  |
| 3.1 Data preprocessing and dwell time computation . . . . .                                                      | 9         |
| 3.2 Estimating the visit matrix $W^{(t)}$ . . . . .                                                              | 10        |
| <b>Supplementary Discussion</b>                                                                                  | <b>16</b> |
| <b>4 Plausibility of predicted racial/socioeconomic disparities</b>                                              | <b>16</b> |
| <b>5 Model limitations</b>                                                                                       | <b>17</b> |
| <b>Supplementary Tables</b>                                                                                      | <b>19</b> |
| Table 1: Most-visited POIs categories (i.e., NAICS) in SafeGraph data . . . . .                                  | 19        |
| Table 2: Mapping of Google mobility data categories to NAICS categories . . . . .                                | 20        |
| Table 3: Correlation between Google and SafeGraph mobility datasets . . . . .                                    | 20        |
| Table 4: Predicted effects of shifting past mobility reduction earlier or later . . . . .                        | 21        |
| Table 5: Predicted effects of scaling magnitude of past mobility reduction . . . . .                             | 21        |
| Table 6: Estimated model parameters in each metro area . . . . .                                                 | 22        |
| <b>Supplementary Figures</b>                                                                                     | <b>23</b> |
| Figure 1: Google vs. SafeGraph mobility trends (New York state) . . . . .                                        | 23        |
| Figure 2: Predicted infections per POI category, bottom vs. top income decile . . . . .                          | 24        |
| Figure 3: Numbers of visits per POI category, bottom vs. top income decile . . . . .                             | 25        |
| Figure 4: Predicted impact of reopening POI categories, bottom vs. top income decile . . . . .                   | 26        |
| Figure 5: Ranges of $R_{\text{base}}$ and $R_{\text{POI}}$ implied by $\psi$ and $\beta_{\text{base}}$ . . . . . | 27        |
| Figure 6: Sensitivity analysis of time-varying base transmission rate . . . . .                                  | 28        |
| Figure 7: Sensitivity analysis on the parametric form for POI transmission rate . . . . .                        | 29        |
| Figure 8: Sensitivity analysis on confirmation rate and delay . . . . .                                          | 30        |
| Figure 9: Fit to daily incident deaths, March 19–May 9, 2020 . . . . .                                           | 31        |
| Figure 10: Different model calibration metrics and “super-spreader” results . . . . .                            | 32        |
| Figure 11: Different model calibration metrics and reopening POI categories . . . . .                            | 33        |
| Figure 12: Different model calibration metrics and predicting socioeconomic disparities . . . . .                | 34        |
| Figure 13: Testing model identifiability with simulated data . . . . .                                           | 35        |
| Figure 14: RMSE on daily incident cases over parameter space of $\psi$ and $\beta_{\text{base}}$ . . . . .       | 36        |

|                                                                                          |    |
|------------------------------------------------------------------------------------------|----|
| Figure 15: POI attributes and reopening categories in Atlanta metro area . . . . .       | 37 |
| Figure 16: POI attributes and reopening categories in Chicago metro area . . . . .       | 37 |
| Figure 17: POI attributes and reopening categories in Dallas metro area . . . . .        | 38 |
| Figure 18: POI attributes and reopening categories in Houston metro area . . . . .       | 38 |
| Figure 19: POI attributes and reopening categories in Los Angeles metro area . . . . .   | 39 |
| Figure 20: POI attributes and reopening categories in Miami metro area . . . . .         | 39 |
| Figure 21: POI attributes and reopening categories in New York metro area . . . . .      | 40 |
| Figure 22: POI attributes and reopening categories in Philadelphia metro area . . . . .  | 40 |
| Figure 23: POI attributes and reopening categories in San Francisco metro area . . . . . | 41 |
| Figure 24: POI attributes and reopening categories in Washington DC metro area . . . . . | 41 |

**Supplementary References** **42**

# Supplementary Methods

## 1 Comparison of Google and SafeGraph mobility data

To assess the reliability of the SafeGraph datasets, we measured the correlation between mobility trends according to SafeGraph versus Google.<sup>1</sup> Google provides a high-level picture of mobility changes around the world for several categories of places, such as grocery stores or restaurants. We analyzed three of the categories defined by Google: *Retail & recreation* (e.g., restaurants, shopping centers, movie theaters), *Grocery & pharmacy* (e.g., grocery stores, farmers markets, pharmacies), and *Residential* (i.e. places of residence). We omitted *Transit stations* because they are not well-covered by SafeGraph POIs, *Parks* because SafeGraph informed us that parks are sometimes inaccurately classified in their data (e.g., other POIs are categorized as parks), and *Workplaces* because we do not model whether people are at work. To analyze the *Retail & recreation* and *Grocery & pharmacy* categories, we used POI visits in the SafeGraph Patterns datasets, identifying POIs in each category based on their 6-digit North American Industry Classification System (NAICS) codes (Table S2). For the *Residential* category, we used SafeGraph Social Distancing Metrics, which provides daily counts of the number of people in each CBG who stayed at home for the entire day.

For each US region and category, Google tracks how the number of visits to the category has changed over the last few months, compared to baseline levels of activity before SARS-CoV-2. To set this baseline, they compute the median number of visits to the category for each day of the week, over a 5-week span from January 3–February 6, 2020. For a given day of interest, they then compute the relative change in number of visits seen on this day compared to the baseline for the corresponding day of week. We replicated this procedure on SafeGraph data, and compared the results to Google’s trends for Washington DC and 14 states that appear in the metro areas that we model. For each region and category, we measured the Pearson correlation between the relative change in number of visits according to Google versus Safegraph, from March 1–May 2, 2020. Across the 15 regions, we found that the median Pearson correlation was 0.96 for *Retail & recreation*, 0.79 for *Grocery & pharmacy*, and 0.88 for *Residential*. As an illustrative example, we visualize the results for New York state in Figure S1, and provide a full table of results for every state in Table S3. The high correlations demonstrate that the SafeGraph and Google mobility datasets agree well on the timing and directional changes of mobility over this time period, providing a validation of the reliability of SafeGraph data.



## 2 Sensitivity analyses and robustness checks

### 2.1 Time-varying base transmission rate

In our model, we assumed that  $\lambda_{c_i}^{(t)}$ , the base rate of infection in CBG  $c_i$ , was equal to a constant base transmission rate  $\beta_{\text{base}}$  multiplied by the infectious fraction of  $c_i$  at time  $t$  (Equation 11). We conducted a sensitivity analysis where we assumed, instead, a time-varying base transmission rate that incorporated an additional factor  $\hat{p}_{c_i}^{(t)}$ , the estimated proportion of people at home in  $c_i$  at time  $t$ . Under this modified model,  $\lambda_{c_i}^{(t)}$  became

$$\lambda_{c_i}^{(t)} = \underbrace{\beta_{\text{base}} \cdot \hat{p}_{c_i}^{(t)}}_{\text{base transmission rate}} \cdot \frac{I_{c_i}^{(t)}}{N_{c_i}}. \quad (1)$$

During the time period we simulate, there was a dramatic increase in the number of people staying at home. As a result, we guessed that there might be a corresponding increase in the frequency and duration of interactions within households. By scaling the base transmission rate with the proportion of people staying home, this sensitivity analysis explored the possibility that the transmission rate outside of POIs might have increased together with the number of people staying home.

We estimated the daily proportion of people staying at home in each CBG by computing `completely_home_device_count/device_count` from SafeGraph’s Social Distancing Metrics. We ran the same procedure (Methods M4) to calibrate this modified model, and evaluated its ability to fit incident daily cases. We found that the modified model did not yield significant improvement over our original model; for example, taking the median over metro areas, the fitted modified model’s RMSE was only 2% smaller than that of the original model. When choosing parameter sets based on fit to the training set (March 1–April 14, 2020), the modified model’s out-of-sample RMSE was 8% smaller than that of the original model, but it only outperformed the original model on 6 out of 10 metro areas, so the improvement was inconsistent. Finally, Figure S6 visualizes the predictions of the fitted modified model compared to the original model; again, they are very similar to each other and have approximately equal fit to the reported cases. Thus, because the modified model did not significantly improve model fit, we opted to use a fixed base transmission rate to keep the model simple.

## 2.2 Modifying the parametric form for POI transmission rates

In our model, the transmission rate at a POI  $p_j$  at hour  $t$ ,

$$\beta_{p_j}^{(t)} := \psi \cdot d_{p_j}^2 \cdot \frac{V_{p_j}^{(t)}}{a_{p_j}}, \quad (2)$$

depends on two key ingredients:  $d_{p_j}^2$ , which reflects how much time visitors spend there, and  $V_{p_j}^{(t)} / a_{p_j}$ , which reflects the density (number of visitors per sq ft) of the POI in that hour. These assumptions are based on prior expectations that a visit is more dangerous for a susceptible individual if they spend more time there and/or if the place is more crowded. To assess empirically the role that each of these two terms play, we compared our transmission rate formula to two perturbed versions of it: one that removed the dwell time term, and another that removed the density term. For each of these formulas, we computed the risk of visiting a POI category as the average transmission rate of the category, with the rate of each POI weighted by the proportion of category visits that went to that POI. Then, we evaluated whether the relative risks predicted by each formula conformed with the rankings of POI categories proposed by independent epidemiological experts.<sup>2,3</sup> In our evaluations, we included all of the categories that we analyzed (i.e., the 20 categories with the most visits in SafeGraph data; see Methods M5) that overlapped with categories described in the external rankings. To compare against Emanuel et al.<sup>2</sup>, we also converted their categorical groupings into numerical score, i.e., “Low”  $\rightarrow$  1, “Low/Medium”  $\rightarrow$  2, etc., up to “High”  $\rightarrow$  5. Sims et al.<sup>3</sup> already provided numerical ratings so we did not have to perform a conversion.

As shown in Figure S7, we find that the predicted relative risks match external sources best when we use our original parametric form that accounts for both dwell time and density: restaurants, cafes, religious organizations, and gyms are among the most dangerous, while grocery stores and retail (e.g., clothing stores) are less dangerous. However, when we assume only dwell time matters and remove the density term, we see unrealistic changes in the ranking: e.g., restaurants drop close to grocery stores, despite both sets of experts deeming them far apart in terms of risk. When we assume only density matters and remove dwell time, we also see unrealistic changes: e.g., limited-service restaurants are predicted to be far riskier than full-service restaurants, and gyms and religious organizations are no longer predicted as risky, which contradicts both of our sources. These findings demonstrate that both factors — the dwell time and density — are important toward faithfully modeling transmission at POIs, since the predictions become less realistic when either factor is taken out.

## 2.3 Stochastic sampling of confirmed cases

To predict confirmed case counts from the SEIR trajectories, our model assumes a fixed proportion of infected people are confirmed after a fixed confirmation delay (Methods M4.2). Since these proportions and delays are quite variable in reality, we conducted a sensitivity analysis where instead we tried stochastically sampling the number of confirmed cases and the confirmation delay. For each day  $d$ , we first computed  $N_{E_{c_i} \rightarrow I_{c_i}}^{(d)}$ , the number of people who became infectious on this day; we then sampled from  $\text{Binom}(N_{E_{c_i} \rightarrow I_{c_i}}^{(d)}, r_c)$  to get the number of confirmed cases that would result from this group of infections. For each case that was to be confirmed, we drew its confirmation delay (i.e., delay from becoming infectious to being confirmed) from distributions fitted on empirical line-list data: either  $\text{Gamma}(1.85, 3.57)^4$  or  $\text{Exp}(6.1)^5$ .

We found that our model predictions barely changed when we sampled case trajectories stochastically using either delay distribution, as opposed to assuming a fixed confirmation rate and delay (Figure S8). However, an advantage of our fixed method is that it allows us to predict confirmed cases up to  $\delta_c$  (i.e., 7) days after the last day of simulation, whereas we cannot do the same when we sample confirmed cases and delays stochastically. This is because, if delays are stochastic, predicting the number of confirmed cases on, for example, the 5th day after the simulation ends depends on the number of newly infectious individuals every day before and including that day, but since the simulation ended days before, the model would not have sufficient information to make the prediction. On the other hand, the fixed method simply translates and scales the newly infectious curve, so we can predict the number of confirmed cases 5 days after the simulation ends, since it only depends on the number of newly infectious individuals 2 days before the end of simulation. Due to this advantage, we opted to use the fixed method.

## 2.4 Model calibration metrics

For each metro area, our model fitting procedure selects all parameter sets that achieve an RMSE within 20% of the best-fit parameter set's RMSE (Methods M4.3). As a final sensitivity analysis, we tested three alternative model fitting procedures that used different metrics to decide when to accept or reject a parameter set. For each procedure, we evaluated the correlation between its ranking of parameter sets and our original ranking. We recomputed our downstream analyses using the fitted models outputted by each procedure and verified that our key results on superspreader POIs (Figure S10), the effects of reopening (Figure S11), and predicted group disparities (Figure S12) all remained similar.

117 **Poisson likelihood model.** Our model calibration procedure, which uses RMSE to assess fit,  
 118 implicitly assumes that error in the number of observed cases is drawn from a normal (Gaussian)  
 119 distribution. As a sensitivity analysis, we tested a Poisson error model instead, using negative log-  
 120 likelihood as a measure of fit, and using the same 20% threshold. We note that the homoscedastic  
 121 Gaussian model will likely prioritize fitting parts of the case trajectory that have higher case counts,  
 122 whereas a Poisson model will comparatively prioritize fitting parts of the case trajectory with lower  
 123 case counts. We found that ranking models via Poisson likelihood was consistent with ranking  
 124 models using RMSE (both computed on daily incident cases, as described above): the median  
 125 Spearman correlation over metro areas between models ranked by Poisson likelihood vs. RMSE  
 126 was 0.97.

127 **Model acceptance threshold.** As described above, we set the acceptance threshold for model  
 128 calibration (i.e., the threshold for rejection sampling in the Approximate Bayesian Computation  
 129 framework) to 20% of the RMSE of the best-fit model. We selected this threshold because beyond  
 130 that point, model fit qualitatively deteriorated based on inspection of the case trajectories. As a  
 131 sensitivity analysis, we selected a different threshold (10%), while still using RMSE as the error  
 132 metric. We do not report correlations here, since the reduced threshold simply corresponded to  
 133 selecting a subset of the originally chosen parameters.

134 **Fitting to deaths.** In addition to the number of confirmed cases, the NYT data also contains the  
 135 daily reported number of deaths due to COVID-19 by county. As an additional test, we calibrated  
 136 our models to fit this death data instead of case data. To estimate the number of deaths  $N_{\text{deaths}}$ ,  
 137 we use a similar process as for the number of cases  $N_{\text{cases}}$ , except that we replace  $r_c$  with  $r_d =$   
 138 0.66%, the estimated infection fatality rate for COVID-19,<sup>6</sup> and  $\delta_c$  with  $\delta_d = 432$  hours (18 days),  
 139 the number of days between becoming infectious and dying<sup>6</sup> (Extended Data Table 2 provides  
 140 references for all parameters). This gives

$$N_{\text{deaths}}^{(d)} = r_d \cdot \sum_{i=1}^m \sum_{\tau=24(d-1)+1-\delta_d}^{24d-\delta_d} N_{E_{c_i} \rightarrow I_{c_i}}^{(\tau)}. \quad (3)$$

141 Because we assume that deaths occur  $\delta_d = 18$  days after individuals become infectious, we com-  
 142 pared with NYT death data starting on March 19, 2020 (18 days after our simulation begins).  
 143 Figure S9 shows that the calibrated models can also fit the trends in the death counts well. Rank-  
 144 ing models using RMSE on deaths was consistent with ranking models using RMSE on cases, with  
 145 a median Spearman correlation over metro areas of 0.99, and as with the above sensitivity analy-

146 ses (changing the likelihood model and the acceptance threshold), we found that our key results  
147 remained similar.

## 148 **2.5 Parameter identifiability**

149 We assess the identifiability of the fitted model parameters  $\psi$ ,  $\beta_{\text{base}}$ , and  $p_0$  as follows. First, we  
150 verify that the model-fitting procedure is able to recover the true parameters when fit on simulated  
151 data for which the true parameters are known. For each metro area, we simulate daily case counts  
152 using the best-fit parameters for that metro area (i.e., those with the minimum RMSE to daily case  
153 counts, as reported in Table S6). We then run our grid search fitting procedure on the simulated  
154 case counts. For all 10 metro areas, as Figure S13 illustrates, the parameters in our grid search that  
155 obtain the lowest RMSE on the simulated data are always the true parameters that were used to  
156 generate that data. In other words, for each metro area, we correctly estimate and recover the true  
157 parameters on the simulated data.

158 As a further assessment of model identifiability, in Figure S14 we plot RMSE on true (not  
159 simulated) daily case counts (that is, the metric used to perform model calibration) as a function  
160 of model parameters  $\beta_{\text{base}}$  and  $\psi$ . (We take the minimum RMSE over values of  $p_0$  so the plots  
161 can be visualized in two dimensions.) As these plots illustrate,  $\beta_{\text{base}}$  and  $\psi$  are correlated, which  
162 is unsurprising because they scale the growth of infections at CBGs and POIs respectively. This  
163 correlation results in uncertainty in the parameter estimates in some metro areas. Throughout  
164 our analyses, we reflect this uncertainty by aggregating results from all parameter settings which  
165 achieve an RMSE within 20% of the best-fit model for each metro area.

## 166 **3 Estimating the mobility network from SafeGraph data**

167 As we discussed in Methods M2, the central technical challenge in constructing our mobility net-  
168 work is estimating the network weights  $W^{(t)} = \{w_{ij}^{(t)}\}$  from SafeGraph data, since this visit matrix  
169 is not directly available from the data. In this section, we describe our estimation process, which  
170 utilizes the iterative proportional fitting procedure<sup>7</sup> (IPFP) to estimate a matrix for each metro area  
171 and each hour from March 1, 2020 to May 2, 2020.

172 **Quantities from SafeGraph data.** To begin, we describe the quantities from SafeGraph data  
173 that we use to make this estimation.

- 174 • The estimated visit matrix  $\hat{W}^{(r)}$  aggregated for the month  $r$ , where we use  $r$  instead of  $t$  to  
175 denote time periods longer than an hour. This is taken from the Patterns dataset, and is ag-  
176 gregated at a monthly level. To account for non-uniform sampling from different CBGs, we

weight the number of SafeGraph visitors from each CBG by the ratio of the CBG population and the number of SafeGraph devices with homes in that CBG.<sup>8</sup>

- $\hat{V}_{p_j}^{(t)}$ : The number of visitors recorded in POI  $p_j$  at hour  $t$ . This is taken from the Weekly Patterns v1 dataset.
- $\hat{h}_{c_i}^{(t)}$ : The estimated fraction of people in CBG  $c_i$  who left their home in day  $\lfloor t/24 \rfloor$ . This is derived by taking  $1 - (\text{completely\_home\_device\_count}/\text{device\_count})$ . These are daily (instead of hourly) metrics in the Social Distancing Metrics dataset.
- $\hat{\delta}_{p_j}$ : The median length of a visit to a POI  $p_j$ . We estimate this by averaging over the weekly values in the `median_dwell` field in the Patterns datasets in March and April 2020.  $\hat{\delta}_{p_j}$  is measured to minute-level resolution and expressed in units of hours, e.g.,  $\hat{\delta}_{p_j} = 1.5$  means a median visit time of 1.5 hours = 90 minutes.

### 3.1 Data preprocessing and dwell time computation

**Hourly visits.** The raw SafeGraph data records the number of visitors that *newly arrive* at each POI  $p_j$  at each hour. However,  $\hat{V}_{p_j}^{(t)}$  above represents the number of visitors that *are present* at a POI in an hour  $t$ ; these visitors may have arrived prior to  $t$ . The aggregate visit matrix  $\hat{W}^{(r)}$ , as well as the visit matrix  $W^{(t)}$  used in our model, are defined similarly. To compute these quantities from the raw data, we make two assumptions: first, that every visitor to  $p_j$  stays for exactly  $\hat{\delta}_{p_j}$  hours, where  $\hat{\delta}_{p_j}$  is the median length of a visit to  $p_j$ , and second, that a visitor who newly arrives in an hour  $t$  is equally likely to arrive at any time from  $[t, t + 1)$ . With these assumptions, we can convert the number of visitor arrivals in each hour into the expected number of visitors present at each hour: for example, if  $\hat{\delta}_{p_j} = 1.5$  hours, then we assume that a visitor who arrives sometime during an hour  $t$  will also be present in hour  $t + 1$  and be present half the time, on expectation, in hour  $t + 2$ . Note that under our definition, visits are still counted even if a visitor does not stay for the entire hour. For example, a visitor that arrives at 9:30am and leaves at 10:10am will be counted as two visits: one during the 9-10am hour and one during the 10-11am hour.

**The dwell time correction factor  $d_{p_j}$ .** To estimate the mean occupancy at each POI  $p_j$  in an hour  $t$ , we multiply the expected number of visitors present at  $p_j$  in hour  $t$  by the dwell time correction factor  $d_{p_j}$ , which measures the expected fraction of an hour that a visitor present at  $p_j$  at any hour will spend there. In other words, conditioned on a visitor being at  $p_j$  at some time within an hour  $t$ ,  $d_{p_j}$  is the expected fraction of the hour  $t$  that the visitor physically spends at  $p_j$ . The same two

207 assumptions above allow us to calculate  $d_{p_j}$ : since each visitor stays for exactly  $\hat{\delta}_{p_j}$  hours, and on  
208 average is counted as being present in  $\hat{\delta}_{p_j} + 1$  different hours, we have  $d_{p_j} = \hat{\delta}_{p_j} / (\hat{\delta}_{p_j} + 1)$ .

209 **Truncating outliers.** As described in Methods M3, our model necessarily makes parametric as-  
210 sumptions about the relationship between POI characteristics (area, hourly visitors, and dwell time)  
211 and transmission rate at the POI; these assumptions may fail to hold for POIs which are outliers,  
212 particularly if SafeGraph data has errors. We mitigate this concern by truncating extreme values  
213 for POI characteristics to prevent data errors from unduly influencing our conclusions. Specifi-  
214 cally, we truncate each POI’s area (i.e., square footage) to the 5th and 95th percentile of areas in  
215 the POI’s category; for every hour, we truncate the number of visitor arrivals for each POI to its  
216 category’s 95th percentile of visitor arrivals in that hour; and we truncate each POI’s median dwell  
217 time to its category’s 90th percentile of median dwell times in that period.

### 218 **3.2 Estimating the visit matrix $W^{(t)}$**

219 **Overview.** We estimate the visit matrix  $W^{(t)} = \{w_{ij}^{(t)}\}$ , which captures the number of visitors  
220 from CBG  $c_i$  to POI  $p_j$  at each hour  $t$  from March 1, 2020 to May 2, 2020, through the iterative  
221 proportional fitting procedure (IPFP).<sup>7</sup> The idea is as follows:

- 222 1. From SafeGraph data, we can derive a time-independent estimate  $\bar{W}$  of the visit matrix  
223 that captures the aggregate distribution of visits from CBGs to POIs from January 2019 to  
224 February 2020.
- 225 2. However, visit patterns differ substantially from hour to hour (e.g., day versus night) and  
226 day to day (e.g., pre- versus post-lockdown). To capture these variations, we use current  
227 SafeGraph data to estimate the CBG marginals  $U^{(t)}$ , i.e., the number of people in each CBG  
228 who are out visiting POIs at hour  $t$ , as well as the POI marginals  $V^{(t)}$ , i.e., the total number  
229 of visitors present at each POI  $p_j$  at hour  $t$ .
- 230 3. We then use IPFP to estimate an hourly visit matrix  $W^{(t)}$  that is consistent with the hourly  
231 marginals  $U^{(t)}$  and  $V^{(t)}$  but otherwise “as similar as possible” to the distribution of visits  
232 in the aggregate visit matrix  $\bar{W}$ . Here, similarity is defined in terms of Kullback-Leibler  
233 divergence; we provide a precise definition below.

234 **Estimating the aggregate visit matrix  $\bar{W}$ .** The estimated monthly visit matrices  $\hat{W}^{(r)}$  are typi-  
235 cally noisy and sparse: SafeGraph only matches a subset of visitors to POIs to their home CBGs,  
236 either for privacy reasons (if there are too few visitors from the given CBG) or because they are



237 unable to link the visitor to a home CBG.<sup>9</sup> To mitigate this issue, we aggregate these visit matrices,  
 238 which are available at the monthly level, over the  $R = 14$  months from January 2019 to February  
 239 2020:

$$\bar{W} := \frac{1}{R} \sum_r \hat{W}^{(r)}. \quad (4)$$

240 Each entry  $\bar{w}_{ij}$  of  $\bar{W}$  represents the estimated number of visitors from CBG  $c_i$  that are present at  
 241 POI  $p_j$  in an hour, averaged over each hour. After March 2020, SafeGraph reports the visit matrices  
 242  $\hat{W}^{(r)}$  on a weekly level in the Weekly Patterns v1 dataset. However, due to inconsistencies in the  
 243 way SafeGraph processes the weekly versus monthly matrices, we only use the monthly matrices  
 244 up until February 2020.

245 **Estimating the POI marginals  $V^{(t)}$ .** We estimate the POI marginals  $V^{(t)} \in \mathbb{R}^n$ , whose  $j$ -th  
 246 element  $V_{p_j}^{(t)}$  represents our estimate of the number of visitors at POI  $p_j$  (from any CBG) at time  $t$ .  
 247 The number of visitors recorded at POI  $p_j$  at hour  $t$  in the SafeGraph data,  $\hat{V}_{p_j}^{(t)}$ , is an underestimate  
 248 because the SafeGraph data only covers on a fraction of the overall population. To correct for this,  
 249 we follow Benzell et al.<sup>10</sup> and compute our final estimate of the visitors at POI  $p_j$  in time  $t$  as

$$V_{p_j}^{(t)} = \frac{\text{US population}}{\text{total number of SafeGraph devices}} \cdot \hat{V}_{p_j}^{(t)}. \quad (5)$$

250 This correction factor is approximately 7, using population data from the most recent 1-year ACS  
 251 (2018).

252 **Estimating the CBG marginals  $U^{(t)}$ .** Next, we estimate the CBG marginals  $U^{(t)} \in \mathbb{R}^m$ . Here,  
 253 the  $i$ -th element  $U_{c_i}^{(t)}$  represents our estimate of the number of visitors in CBG  $c_i$  who are out  
 254 visiting a POI at time  $t$ . We first use the POI marginals  $V^{(t)}$  to calculate the total number of people  
 255 who are out visiting any POI from any CBG at time  $t$ ,

$$N_{\text{POIs}}^{(t)} := \sum_{j=1}^n V_{p_j}^{(t)}, \quad (6)$$

256 where  $n$  is the total number of POIs. Next, we estimate the number of people from each CBG  $c_i$   
 257 who are not at home at time  $t$  as  $\hat{h}_{c_i}^{(t)} N_{c_i}$ ; recall that  $N_{c_i}$  is the total population of  $c_i$ , as derived  
 258 from US Census data. In general, the total number of people who are not at home in their CBGs,  
 259  $\sum_{i=1}^m \hat{h}_{c_i}^{(t)} N_{c_i}$ , will not be equal to  $N_{\text{POIs}}^{(t)}$ , the number of people who are out visiting any POI. This



260 discrepancy occurs for several reasons: for example, some people might have left their homes to  
 261 travel to places that SafeGraph does not track, SafeGraph might not have been able to determine  
 262 the home CBG of a POI visitor, etc.

263 To correct for this discrepancy, we assume that the relative proportions of POI visitors com-  
 264 ing from each CBG follows the relative proportions of people who are not at home in each CBG.  
 265 We thus estimate  $U_{c_i}^{(t)}$  by apportioning the  $N_{\text{POIs}}^{(t)}$  total POI visitors at time  $t$  according to the pro-  
 266 portion of people who are not at home in each CBG  $c_i$  at time  $t$ :

$$U_{c_i}^{(t)} := N_{\text{POIs}}^{(t)} \cdot \frac{\hat{h}_{c_i}^{(t)} N_{c_i}}{\sum_{k=1}^m \hat{h}_{c_k}^{(t)} N_{c_k}}, \quad (7)$$

267 This construction ensures that the POI and CBG marginals match, i.e.,  $N_{\text{POIs}}^{(t)} = \sum_{j=1}^n V_{p_j}^{(t)} =$   
 268  $\sum_{i=1}^m U_{c_i}^{(t)}$ .

269 **Iterative proportional fitting procedure (IPFP).** IPFP is a classic statistical method<sup>7</sup> for ad-  
 270 justing joint distributions to match pre-specified marginal distributions, and it is also known in the  
 271 literature as biproportional fitting, the RAS algorithm, or raking.<sup>11</sup> In the social sciences, it has  
 272 been widely used to infer the characteristics of local subpopulations (e.g., within each CBG) from  
 273 aggregate data.<sup>12–14</sup>

274 We estimate the visit matrix  $W^{(t)}$  by running IPFP on the aggregate visit matrix  $\bar{W}$ , the  
 275 CBG marginals  $U^{(t)}$ , and the POI marginals  $V^{(t)}$  constructed above. Our goal is to construct a  
 276 non-negative matrix  $W^{(t)} \in \mathbb{R}^{m \times n}$  whose rows sum up to the CBG marginals  $U^{(t)}$ ,

$$U_{c_i}^{(t)} = \sum_{j=1}^n w_{ij}^{(t)}, \quad (8)$$

277 and whose columns sum up to the POI marginals  $V_{p_j}^{(t)}$ ,

$$V_{p_j}^{(t)} = \sum_{i=1}^m w_{ij}^{(t)}, \quad (9)$$

278 but whose distribution is otherwise “as similar as possible”, in the sense of Kullback-Leibler di-  
 279 vergence, to the distribution over visits induced by the aggregate visit matrix  $\bar{W}$ .

280 IPFP is an iterative algorithm that alternates between scaling each row to match the row  
 281 (CBG) marginals  $U^{(t)}$  and scaling each column to match the column (POI) marginals  $V^{(t)}$ . We  
 282 provide pseudocode in Algorithm 1. For each value of  $t$  used in our simulation, we run IPFP sep-

---

**Algorithm 1:** Iterative proportional fitting procedure to estimate visit matrix  $W^{(t)}$ 


---

**Input:** Aggregate visits  $\bar{W} \in \mathbb{R}^{m \times n}$   
 CBG marginals  $U^{(t)} \in \mathbb{R}^m$ ; POI marginals  $V^{(t)} \in \mathbb{R}^n$   
 Number of iterations  $\tau_{\max}$   
 Initialize  $W^{(t,0)} = \bar{W}$   
**for**  $\tau = 1, \dots, \tau_{\max}$  **do**  
   **if**  $\tau$  is odd **then**  
     **for**  $i = 1, \dots, m$  **do**  
        $\alpha_i \leftarrow U_{c_i}^{(t)} / \sum_{j=1}^n w_{ij}^{(t,\tau-1)}$  // Compute scaling factor for row  
        $i$   
        $W_{i,:}^{(t,\tau)} \leftarrow \alpha_i * W_{i,:}^{(t,\tau-1)}$  // Rescale row  $i$   
     **end**  
   **else if**  $\tau$  is even **then**  
     **for**  $j = 1, \dots, n$  **do**  
        $\beta_j \leftarrow V_{p_j}^{(t)} / \sum_{i=1}^m w_{ij}^{(t,\tau-1)}$  // Compute scaling factor for col  
        $j$   
        $W_{:,j}^{(t,\tau)} \leftarrow \beta_j * W_{:,j}^{(t,\tau-1)}$  // Rescale col  $j$   
     **end**  
   **end**  
**end**  
 $W^{(t)} \leftarrow W^{(t,\tau_{\max})}$

---

283 arately for  $\tau_{\max} = 100$  iterations. Note that IPFP is invariant to scaling the absolute magnitude of  
 284 the entries in  $\bar{W}$ , since the total number of visits it returns is fixed by the sum of the marginals; in-  
 285 stead, its output depends only on the distribution over visits in  $\bar{W}$ . The notion of similarity invoked  
 286 above has a maximum likelihood interpretation: if IPFP converges, then it returns a visit matrix  
 287  $W^{(t)}$  whose induced distribution minimizes the Kullback-Leibler divergence to the distribution  
 288 induced by  $\bar{W}$ .<sup>15</sup>

289 **Convergence of IPFP.** For completeness, we briefly review the convergence properties of IPFP.  
 290 Consider the  $L_1$ -error function

$$E^{(t,\tau)} := \underbrace{\sum_i \left| U_{c_i}^{(t)} - \sum_j w_{ij}^{(t)} \right|}_{\text{Error in row marginals}} + \underbrace{\sum_j \left| V_{p_j}^{(t)} - \sum_i w_{ij}^{(t)} \right|}_{\text{Error in column marginals}}, \quad (10)$$

291 which sums up the errors in the row (CBG) and column (POI) marginals of the visit matrix  $W^{(t,\tau)}$   
 292 from the  $\tau$ -th iteration of IPFP. Each iteration of IPFP monotonically reduces this  $L_1$ -error  $E^{(t,\tau)}$ ,

293 i.e.,  $E^{(t,\tau)} \geq E^{(t,\tau+1)}$  for all  $\tau \geq 0$ .<sup>16</sup> In other words, the row and column sums of  $W^{(t,\tau)}$  (which  
 294 is initialized as  $W^{(t,0)} = \bar{W}$ ) progressively get closer to (or technically, no further from) the target  
 295 marginals as the iteration number  $\tau$  increases. Moreover, IPFP maintains the cross-product ratios  
 296 of the aggregate matrix  $\bar{W}$ , i.e.,

$$\frac{w_{ij}^{(t,\tau)} w_{kl}^{(t,\tau)}}{w_{il}^{(t,\tau)} w_{kj}^{(t,\tau)}} = \frac{\bar{w}_{ij} \bar{w}_{kl}}{\bar{w}_{il} \bar{w}_{kj}} \quad (11)$$

297 for all matrix entries indexed by  $i, j, k, \ell$ , for all  $t$ , and for all iterations  $\tau$ .

298 IPFP converges to a unique solution, in the sense that  $W^{(t)} = \lim_{\tau \rightarrow \infty} W^{(t,\tau)}$ , if there exists  
 299 a matrix  $W^{(t)}$  that fits the row and column marginals while maintaining the sparsity pattern (i.e.,  
 300 location of zeroes) of  $\bar{W}$ .<sup>16</sup> If IPFP converges, then the  $L_1$ -error also converges to 0 as  $\tau \rightarrow \infty$ ,<sup>16</sup>  
 301 and  $W^{(t)}$  is the maximum likelihood solution in the following sense. For a visit matrix  $W = \{w_{ij}\}$ ,  
 302 let  $P_W$  represent a multinomial distribution over the  $mn$  entries of  $W$  with probability proportional  
 303 to  $w_{ij}$ , and define  $\mathcal{U}^{(t)} \subseteq \mathbb{R}_+^{m \times n}$  and  $\mathcal{V}^{(t)} \subseteq \mathbb{R}^{m \times n}$  as the set of non-negative matrices whose row  
 304 and column marginals match  $U^{(t)}$  and  $V^{(t)}$  respectively. Then, if IPFP converges,

$$W^{(t)} = \arg \min_{W \in \mathcal{U}^{(t)} \cap \mathcal{V}^{(t)}} \text{KL}(P_W \| P_{\bar{W}}), \quad (12)$$

305 where  $\text{KL}(p \| q)$  is the Kullback-Leibler divergence  $\text{KL}(p \| q) = \mathbb{E}_p[\log \frac{p(x)}{q(x)}]$ . In other words, IPFP  
 306 returns a visit matrix  $W^{(t)}$  whose induced distribution  $P_{W^{(t)}}$  is the I-projection of the aggregate  
 307 visit distribution  $P_{\bar{W}}$  on the set of distributions with compatible row and column marginals.<sup>15</sup> In  
 308 fact, IPFP can be viewed as an alternating sequence of I-projections onto the row marginals and  
 309 I-projections onto the column marginals.<sup>15,17</sup>

310 However, in our setting, IPFP typically does not return a unique solution and instead oscil-  
 311 lates between two accumulation points, one that fits the row marginals and another that fits the  
 312 column marginals.<sup>17</sup> This is because  $\bar{W}$  is highly sparse (there is no recorded interaction between  
 313 most CBGs and POIs), so the marginals are sometimes impossible to reconcile. For example, sup-  
 314 pose there is some CBG  $c_i$  and POI  $p_j$  such that  $\bar{w}_{ij}$  is the only non-zero entry in the  $i$ -th row and  
 315  $j$ -th column of  $\bar{W}$ , i.e., visitors from  $c_i$  only travel to  $p_j$  and conversely visitors from  $p_j$  are all  
 316 from  $c_i$ . Then, if  $U_{c_i}^{(t)} \neq V_{p_j}^{(t)}$ , there does not exist any solution  $W^{(t)}$  such that  $U_{c_i}^{(t)} = V_{p_j}^{(t)} = w_{ij}^{(t)}$ .  
 317 Note that in this scenario, IPFP still monotonically decreases the  $L_1$ -error.<sup>16</sup>

318 In our implementation (Algorithm 1), we take  $\tau_{\max} = 100$ , so IPFP ends by fitting the column  
 319 (POI) marginals. This ensures that our visit matrix  $W^{(t)}$  is fully compatible with the POI marginals

320  $V^{(t)}$ , i.e.,

$$V_{p_j}^{(t)} = \sum_{i=1}^m w_{ij}^{(t)}, \quad (13)$$

321 while still minimizing the  $L_1$ -error  $E^{(t,\tau)}$  with respect to the CBG marginals  $U^{(t)}$ . Empirically, we  
322 find that  $\tau_{\max} = 100$  iterations of IPFP are sufficient to converge to this oscillatory regime.

## Supplementary Discussion

### 4 Plausibility of predicted racial/socioeconomic disparities

To assess the plausibility of the model’s predicted disparities in infection rates, we compared the model’s predicted racial disparities to observed racial disparities in mortality rates. (Data on socioeconomic disparities in mortality was not systematically available on a national level.) The model’s predicted racial disparities are generally of the same magnitude as reported racial disparities in mortality rates—for example, the overall reported black mortality rate is  $2.4\times$  higher than the white mortality rate,<sup>18</sup> which is similar to the median racial disparity across metro areas of  $3.0\times$  that our model predicts (Main Figure 3b). However, we note that this is an imperfect comparison because many factors besides mobility contribute to racial disparities in death rates.

In addition, we observed that our model predicted unusually large socioeconomic and racial disparities in infection rates in the Philadelphia metro area. To understand why the model predicted such large disparities, we inspected the mobility factors discussed in the main text; namely, how much each group was able to reduce their mobility, and whether disadvantaged groups encountered higher transmission rates at POIs. First, we found that higher-income CBGs and more white CBGs in Philadelphia were able to reduce their mobility substantially more than lower-income CBGs and less white CBGs, respectively (Extended Data Figure 6). While these trends were true for every metro area, the gap between income groups and racial groups was especially noticeable for Philadelphia. The other key to Philadelphia’s outlier status lay in the comparison of predicted transmission rates. Generally, we found that individuals from lower-income and less white CBGs tended to visit POIs with higher predicted transmission rates (Extended Data Tables 3 and 4). This was particularly true for Philadelphia; in 19 out of 20 POI categories, individuals from lower-income CBGs in Philadelphia encountered higher predicted transmission rates than individuals from high-income CBGs, and CBGs with the lowest percentage of white residents encountered higher predicted transmission rates than the CBGs with the highest percentage of white residents in 18 out of 20 categories. The predicted transmission rates encountered by individuals from lower-income CBGs in Philadelphia are often dramatically higher than those encountered by higher-income CBGs; for example, up to  $10.4\times$  higher for grocery stores. Digging deeper, this is because the average grocery store visited by lower-income CBGs has  $5.3\times$  the number of hourly visitors per square foot, and visitors tend to stay 86% longer. Furthermore, Philadelphia’s large discrepancy in density between lower-income and higher-income POIs in SafeGraph data is consistent with US Census data, which shows that the discrepancy in *population* density between lower- and higher-income CBGs is larger in Philadelphia than in any of the other metro areas that we examine. In

356 Philadelphia, CBGs in the bottom income decile have a population density  $8.2\times$  those in the top  
357 income decile, a considerably larger disparity than the overall median across metro areas ( $3.3\times$ )  
358 or the next-highest CBG ( $4.5\times$ ).

359 Since there are many other factors contributing to disparity that we do not model, we do not  
360 place too much weight on our model’s prediction that Philadelphia’s disparities will be larger than  
361 those of other cities. However, we consider this a valuable finding in terms of Philadelphia’s mobil-  
362 ity patterns, suggesting that mobility may play an especially strong role in driving socioeconomic  
363 and racial infection disparities in this metro area, and we encourage policy-makers to be aware of  
364 how differences in mobility patterns may exacerbate the disproportionate impact of SARS-CoV-2  
365 on disadvantaged groups.

## 366 **5 Model limitations**

367 In this section, we discuss limitations in the dataset and model which are relevant to interpreting  
368 our results. The cell phone mobility dataset we use has limitations: it does not cover all popula-  
369 tions (e.g., prisoners, children under 13, or adults without smartphones), does not contain all POIs  
370 (e.g., nursing homes are undercovered, and we exclude schools and hospitals from our analysis  
371 of POI category risks), and cannot capture sub-CBG heterogeneity in demographics. Individuals  
372 may also be double-counted in the dataset if they carry multiple cell phones. While the dataset  
373 allows us to illuminate mobility-related mechanisms which contribute to racial and socioeconomic  
374 disparities, these disparities are also driven by differences our dataset cannot capture (e.g., public  
375 transit use, or working at a restaurant as opposed to dining there) as well as non-mobility-related  
376 factors including differences in household size, access to healthcare, and comorbidities. These  
377 limitations notwithstanding, cell phone mobility data in general and SafeGraph data in particular  
378 have been instrumental and widely used in modeling SARS-CoV-2 spread.<sup>10,19–26</sup>

379 Our model itself is parsimonious, and does not include such relevant features as asymp-  
380 tomatic transmission; variation in household size; travel and seeding between metro areas; differen-  
381 tials in susceptibility due to pre-existing conditions or access to care; age-related variation in mor-  
382 tality rates or susceptibility (e.g., for modeling transmission at elementary and secondary schools);  
383 various time-varying transmission-reducing behaviors (e.g., hand-washing, mask-wearing, and  
384 holding events in outdoor spaces); and some POI-specific risk factors (e.g., ventilation). Although  
385 our model recovers case trajectories and known infection disparities even without incorporating  
386 these features, we caution that this predictive accuracy does not mean that our predictions should  
387 be interpreted in a narrow causal sense. Because certain types of POIs or subpopulations may  
388 disproportionately select for certain types of omitted processes, our findings on the relative risks

389 of different POIs should be interpreted with due caution, and the potential public health benefits of  
390 restricting access to POIs should always be assessed in conjunction with the short-run and long-  
391 run economic impacts of doing so. However, the predictive accuracy of our model suggests that  
392 it broadly captures the relationship between mobility and transmission, and we thus expect our  
393 broad conclusions—e.g., that people from lower-income CBGs have higher infection rates in part  
394 because because they tend to visit smaller, denser POIs and because they have not been able to  
395 reduce mobility by as much (likely in part because they cannot as easily work from home<sup>27</sup>)—to  
396 hold robustly.

## Supplementary Tables

| Category                               | % visits | % POIs |
|----------------------------------------|----------|--------|
| Full-Service Restaurants               | 14.82%   | 10.86% |
| Limited-Service Restaurants            | 8.08%    | 3.69%  |
| Elementary and Secondary Schools       | 6.36%    | 3.06%  |
| Other General Stores                   | 5.97%    | 1.37%  |
| Gas Stations                           | 4.56%    | 2.94%  |
| Fitness Centers                        | 4.55%    | 2.98%  |
| Grocery Stores                         | 4.16%    | 2.17%  |
| Cafes & Snack Bars                     | 4.01%    | 2.70%  |
| Hotels & Motels                        | 2.93%    | 1.57%  |
| Religious Organizations                | 2.31%    | 5.04%  |
| Parks & Similar Institutions           | 1.93%    | 2.31%  |
| Hardware Stores                        | 1.79%    | 1.87%  |
| Department Stores                      | 1.78%    | 0.32%  |
| Child Day Care Services                | 1.71%    | 2.76%  |
| Offices of Physicians                  | 1.63%    | 4.02%  |
| Pharmacies & Drug Stores               | 1.54%    | 0.95%  |
| Sporting Goods Stores                  | 1.16%    | 1.05%  |
| Automotive Parts Stores                | 1.16%    | 1.80%  |
| Used Merchandise Stores                | 1.15%    | 1.01%  |
| Colleges & Universities                | 1.12%    | 0.44%  |
| Convenience Stores                     | 1.09%    | 0.66%  |
| Pet Stores                             | 0.93%    | 0.85%  |
| New Car Dealers                        | 0.73%    | 0.43%  |
| Hobby & Toy Stores                     | 0.73%    | 0.36%  |
| Offices of Dentists                    | 0.70%    | 2.67%  |
| Commercial Banking                     | 0.70%    | 2.05%  |
| Gift Stores                            | 0.69%    | 0.57%  |
| Liquor Stores                          | 0.61%    | 0.82%  |
| Women's Clothing Stores                | 0.59%    | 1.00%  |
| Home Health Care Services              | 0.55%    | 1.02%  |
| Furniture Stores                       | 0.53%    | 0.89%  |
| Electronics Stores                     | 0.51%    | 0.72%  |
| Used Car Dealers                       | 0.50%    | 1.08%  |
| Book Stores                            | 0.49%    | 0.32%  |
| Musical Instrument Stores              | 0.49%    | 0.50%  |
| Optical Goods Stores                   | 0.47%    | 0.76%  |
| Family Clothing Stores                 | 0.46%    | 0.49%  |
| Car Repair Shops                       | 0.41%    | 1.83%  |
| Offices of Mental Health Practitioners | 0.41%    | 1.05%  |
| Tobacco Stores                         | 0.41%    | 0.31%  |
| Office Supplies                        | 0.40%    | 0.33%  |
| Beauty Salons                          | 0.39%    | 1.58%  |
| Paint and Wallpaper Stores             | 0.38%    | 0.56%  |
| Other Gas Stations                     | 0.37%    | 0.20%  |
| Sports Teams and Clubs                 | 0.37%    | 0.03%  |
| Cosmetics & Beauty Stores              | 0.36%    | 0.71%  |
| Jewelry Stores                         | 0.34%    | 0.60%  |
| Junior Colleges                        | 0.34%    | 0.07%  |
| Sewing & Piece Goods Stores            | 0.34%    | 0.39%  |
| Senior Homes                           | 0.34%    | 0.41%  |
| Libraries & Archives                   | 0.3%     | 0.3%   |

**Table S1:** The 50 POI categories accounting for the largest fraction of visits in the full SafeGraph dataset. Collectively they account for 88% of POI visits and 76% of POIs.



| Google category     | Google description   | NAICS categories                                           |
|---------------------|----------------------|------------------------------------------------------------|
| Retail & recreation | Restaurants          | Full-Service Restaurants                                   |
|                     | Cafes                | Limited-Service Restaurants                                |
|                     | Shopping centers     | Snack and Nonalcoholic Beverage Bars                       |
|                     | Theme parks          | Drinking Places (Alcoholic Beverages)                      |
|                     | Museums              | Malls, Amusement and Theme Parks                           |
|                     | Libraries            | Museums, Libraries and Archives                            |
|                     | Movie theaters       | Motion Picture Theaters (except Drive-Ins)                 |
| Grocery & pharmacy  | Grocery markets      | Supermarkets and Other Grocery (except Convenience) Stores |
|                     | Food warehouses      | Food (Health) Supplement Stores                            |
|                     | Farmers markets      | Fish and Seafood Markets                                   |
|                     | Specialty food shops | All Other Specialty Food Stores                            |
|                     | Drug stores          | Pharmacies and Drug Stores                                 |
|                     | Pharmacies           |                                                            |

**Table S2:** Mapping of Google mobility data categories to NAICS categories. Google descriptions taken from [https://www.google.com/covid19/mobility/data\\_documentation.html](https://www.google.com/covid19/mobility/data_documentation.html).

| State          | Retail & recreation | Grocery & pharmacy | Residential |
|----------------|---------------------|--------------------|-------------|
| California     | 0.947               | 0.834              | 0.876       |
| Delaware       | 0.957               | 0.847              | 0.856       |
| Florida        | 0.963               | 0.814              | 0.885       |
| Georgia        | 0.948               | 0.682              | 0.868       |
| Illinois       | 0.964               | 0.710              | 0.899       |
| Indiana        | 0.956               | 0.741              | 0.877       |
| Maryland       | 0.956               | 0.825              | 0.886       |
| New Jersey     | 0.951               | 0.720              | 0.935       |
| New York       | 0.958               | 0.763              | 0.909       |
| Pennsylvania   | 0.971               | 0.850              | 0.875       |
| Texas          | 0.965               | 0.789              | 0.886       |
| Virginia       | 0.967               | 0.840              | 0.877       |
| Washington, DC | 0.959               | 0.889              | 0.780       |
| West Virginia  | 0.960               | 0.740              | 0.814       |
| Wisconsin      | 0.967               | 0.783              | 0.886       |
| <b>Median</b>  | 0.959               | 0.789              | 0.877       |

**Table S3:** Pearson correlations between the Google and SafeGraph mobility timeseries. We report correlations over the period of March 1–May 2, 2020 for the 15 states that we model. See SI Methods 1 for details.

| <b>Metro area</b> | <b>7 days earlier</b> | <b>3 days earlier</b> | <b>3 days later</b>  | <b>7 days later</b>  |
|-------------------|-----------------------|-----------------------|----------------------|----------------------|
| Atlanta           | 0.586 (0.397, 0.834)  | 0.803 (0.639, 0.956)  | 1.359 (1.075, 1.741) | 1.981 (1.189, 2.761) |
| Chicago           | 0.641 (0.563, 0.711)  | 0.848 (0.769, 0.933)  | 1.226 (1.143, 1.365) | 1.542 (1.446, 1.639) |
| Dallas            | 0.642 (0.495, 0.782)  | 0.855 (0.693, 1.013)  | 1.298 (1.09, 1.577)  | 1.722 (1.487, 1.966) |
| Houston           | 0.656 (0.500, 0.812)  | 0.848 (0.663, 1.021)  | 1.288 (1.079, 1.541) | 1.731 (1.493, 2.064) |
| Los Angeles       | 0.608 (0.407, 0.848)  | 0.816 (0.639, 0.984)  | 1.265 (1.041, 1.554) | 1.692 (1.216, 2.137) |
| Miami             | 0.576 (0.424, 0.795)  | 0.792 (0.669, 0.919)  | 1.317 (1.117, 1.559) | 1.856 (1.281, 2.27)  |
| New York City     | 0.818 (0.795, 0.856)  | 0.909 (0.890, 0.927)  | 1.113 (1.094, 1.133) | 1.27 (1.246, 1.307)  |
| Philadelphia      | 0.799 (0.731, 0.868)  | 0.916 (0.823, 1.005)  | 1.12 (1.031, 1.206)  | 1.287 (1.246, 1.351) |
| San Francisco     | 0.609 (0.408, 0.798)  | 0.815 (0.666, 1.012)  | 1.271 (1.048, 1.527) | 1.689 (1.452, 2.029) |
| Washington DC     | 0.671 (0.447, 0.879)  | 0.848 (0.627, 1.045)  | 1.207 (0.959, 1.586) | 1.488 (1.158, 1.789) |

**Table S4:** Effects of shifting past mobility reduction earlier or later. We report the expected ratio of the number of infections predicted under the counterfactual to the number of infections predicted using observed mobility data; a ratio lower than 1 means that fewer predicted infections occurred under the counterfactual. The numbers in parentheses indicate the 2.5th and 97.5th percentiles across sampled parameters and stochastic realizations. See Methods M5 for details.

| <b>Metro area</b> | <b>0%</b>               | <b>25%</b>           | <b>50%</b>           |
|-------------------|-------------------------|----------------------|----------------------|
| Atlanta           | 16.593 (3.088, 30.532)  | 7.714 (1.73, 15.833) | 2.265 (1.17, 3.673)  |
| Chicago           | 6.202 (5.2, 7.088)      | 3.329 (2.761, 3.759) | 1.587 (1.421, 1.704) |
| Dallas            | 18.026 (10.361, 27.273) | 5.908 (3.75, 8.857)  | 1.87 (1.532, 2.349)  |
| Houston           | 18.964 (11.949, 32.755) | 5.725 (3.761, 9.233) | 1.659 (1.362, 2.109) |
| Los Angeles       | 12.926 (3.15, 24.207)   | 5.097 (1.779, 9.721) | 1.665 (1.176, 2.309) |
| Miami             | 10.781 (3.382, 15.935)  | 4.85 (1.886, 7.405)  | 1.777 (1.208, 2.3)   |
| New York City     | 2.037 (1.902, 2.174)    | 1.73 (1.603, 1.811)  | 1.333 (1.258, 1.389) |
| Philadelphia      | 2.976 (2.734, 3.39)     | 1.894 (1.747, 2.137) | 1.211 (1.141, 1.305) |
| San Francisco     | 9.743 (7.089, 15.596)   | 4.282 (3.124, 6.781) | 1.714 (1.427, 2.255) |
| Washington DC     | 5.85 (2.329, 9.713)     | 3.032 (1.541, 4.646) | 1.509 (1.132, 1.959) |

**Table S5:** Scaling the magnitude of past mobility reduction. Each column represents a counterfactual scenario where the magnitude of mobility reduction is only a some percentage of the observed mobility reduction, i.e., 0% corresponds to no mobility reduction, and 100% corresponds to the real, observed level of mobility reduction. We report the expected ratio of the number of infections predicted under the counterfactual to the number of infections predicted using observed mobility data; a ratio lower than 1 means that fewer infections occurred under the counterfactual. The numbers in parentheses indicate the 2.5th and 97.5th percentiles across sampled parameters and stochastic realizations. See Methods M5 for details.

| Metro area    | # sets | $\beta_{\text{base}}$ | $\psi$            | $p_0$                                                          |
|---------------|--------|-----------------------|-------------------|----------------------------------------------------------------|
| Atlanta       | 16     | 0.004 (0.001, 0.014)  | 2388 (515, 3325)  | $5 \times 10^{-4}$ ( $1 \times 10^{-4}$ , $2 \times 10^{-3}$ ) |
| Chicago       | 4      | 0.009 (0.006, 0.011)  | 1764 (1139, 2076) | $2 \times 10^{-4}$ ( $2 \times 10^{-4}$ , $5 \times 10^{-4}$ ) |
| Dallas        | 5      | 0.009 (0.004, 0.011)  | 1452 (1139, 2388) | $2 \times 10^{-4}$ ( $1 \times 10^{-4}$ , $2 \times 10^{-4}$ ) |
| Houston       | 8      | 0.001 (0.001, 0.009)  | 2076 (1139, 2076) | $2 \times 10^{-4}$ ( $1 \times 10^{-4}$ , $5 \times 10^{-4}$ ) |
| Los Angeles   | 25     | 0.006 (0.001, 0.016)  | 2076 (515, 3637)  | $2 \times 10^{-4}$ ( $2 \times 10^{-5}$ , $1 \times 10^{-3}$ ) |
| Miami         | 7      | 0.001 (0.001, 0.011)  | 2388 (515, 2388)  | $2 \times 10^{-4}$ ( $2 \times 10^{-4}$ , $2 \times 10^{-3}$ ) |
| New York City | 7      | 0.001 (0.001, 0.009)  | 2700 (1452, 3013) | $1 \times 10^{-4}$ ( $5 \times 10^{-5}$ , $1 \times 10^{-3}$ ) |
| Philadelphia  | 3      | 0.009 (0.001, 0.009)  | 827 (827, 1452)   | $5 \times 10^{-4}$ ( $1 \times 10^{-4}$ , $5 \times 10^{-4}$ ) |
| San Francisco | 5      | 0.006 (0.001, 0.009)  | 1139 (827, 1764)  | $5 \times 10^{-4}$ ( $2 \times 10^{-4}$ , $1 \times 10^{-3}$ ) |
| Washington DC | 17     | 0.016 (0.001, 0.019)  | 515 (515, 3949)   | $5 \times 10^{-4}$ ( $2 \times 10^{-5}$ , $5 \times 10^{-4}$ ) |

**Table S6:** Estimated model parameters in each metro area. # sets counts the number of parameter sets that are within 20% of the RMSE of the best-fit parameter set, as described in Methods M4. For each of  $\beta_{\text{base}}$  (which scales the transmission rates at CBGs),  $\psi$  (which scales the transmission rates at POIs), and  $p_0$  (the initial proportion of infected individuals), we show the best-fit parameter set and, in parentheses, the corresponding minimum and maximum within the 20% threshold.

# Supplementary Figures

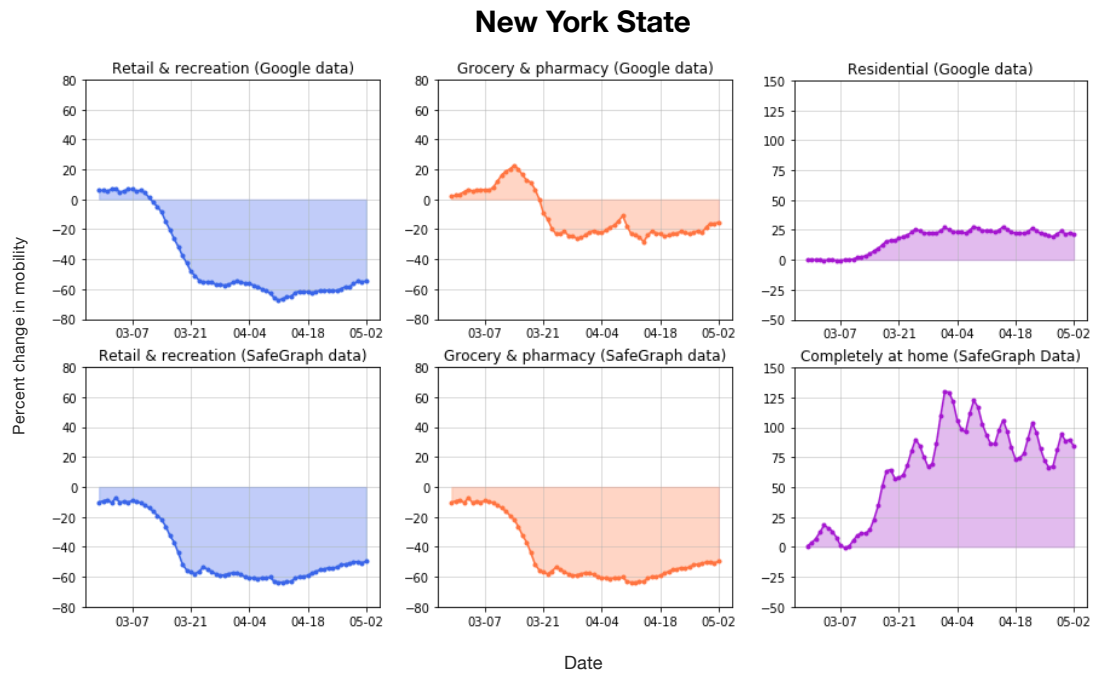

**Figure S1:** Google versus SafeGraph mobility trends for New York state. The x-axis is the same across plots, showing the date from March 1–May 2, 2020. The y-axis represents percent change in mobility levels compared to baseline activity in January and February 2020. For the categories from left to right, the Pearson correlations between the datasets in New York state are 0.96, 0.76, and 0.91. See SI Methods 1 for details.

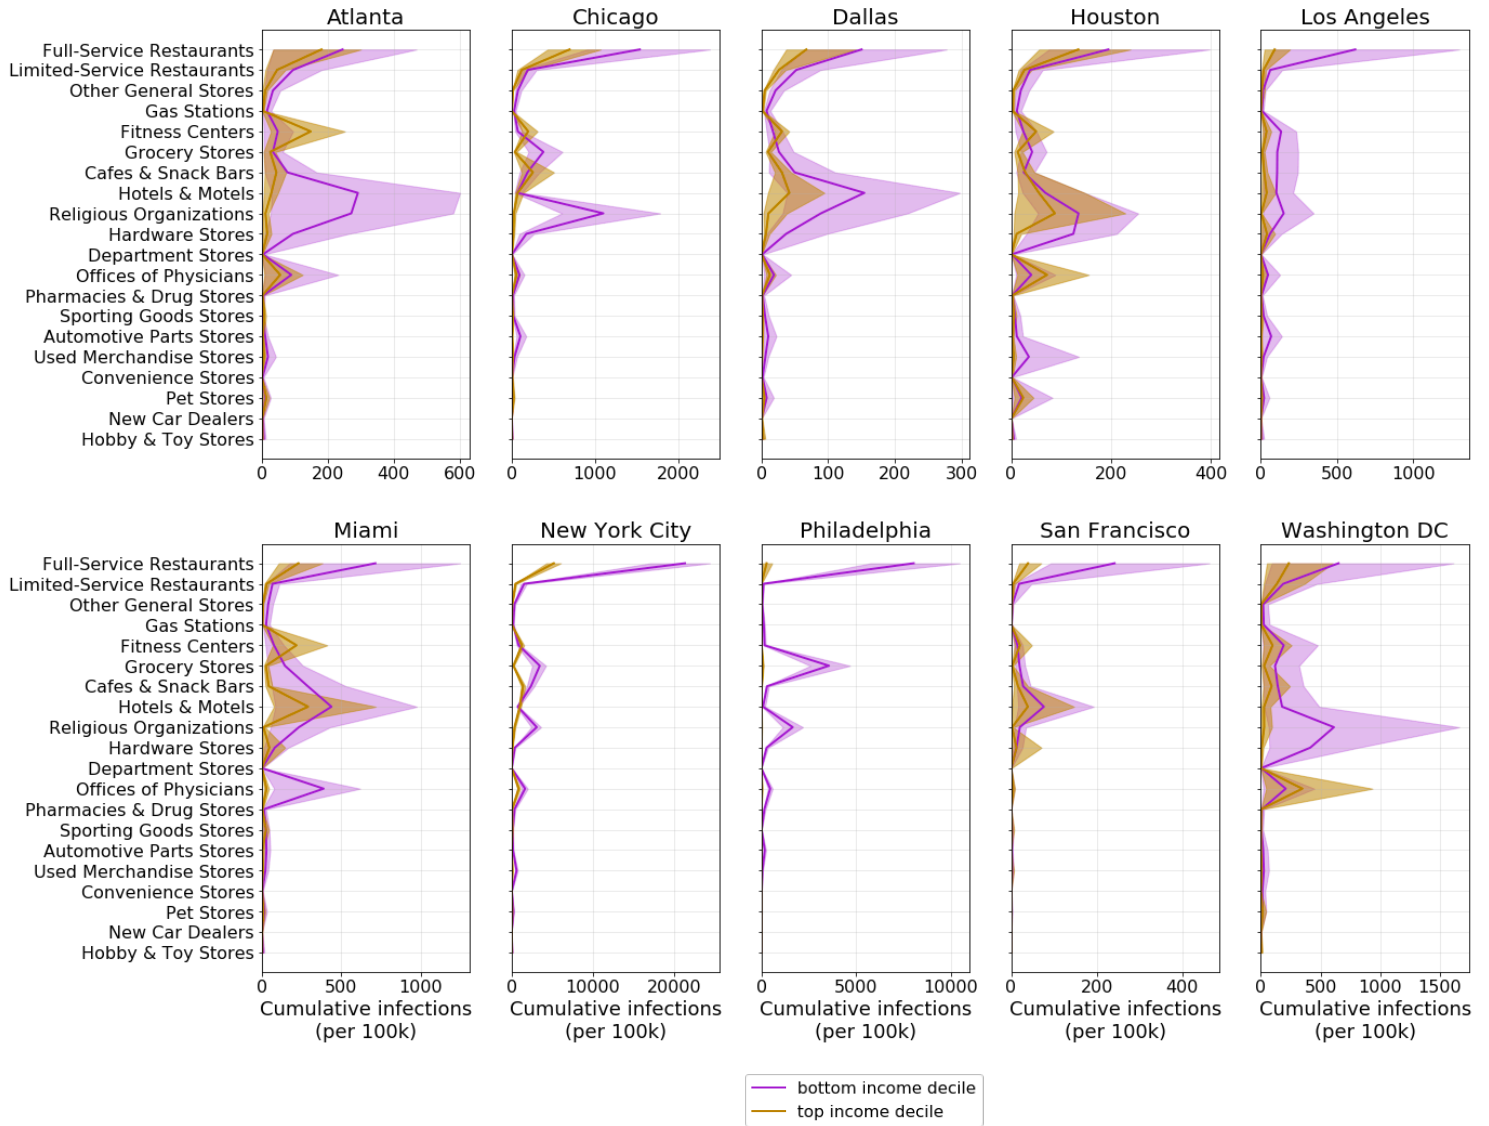

**Figure S2:** For each POI category, we plot the predicted cumulative number of infections (per 100k population) that occurred at that category for CBGs in the bottom- (purple) and top- (gold) income deciles. Shaded regions denote 2.5th and 97.5th percentiles across sampled parameters and stochastic realizations. See Methods M5 for details.

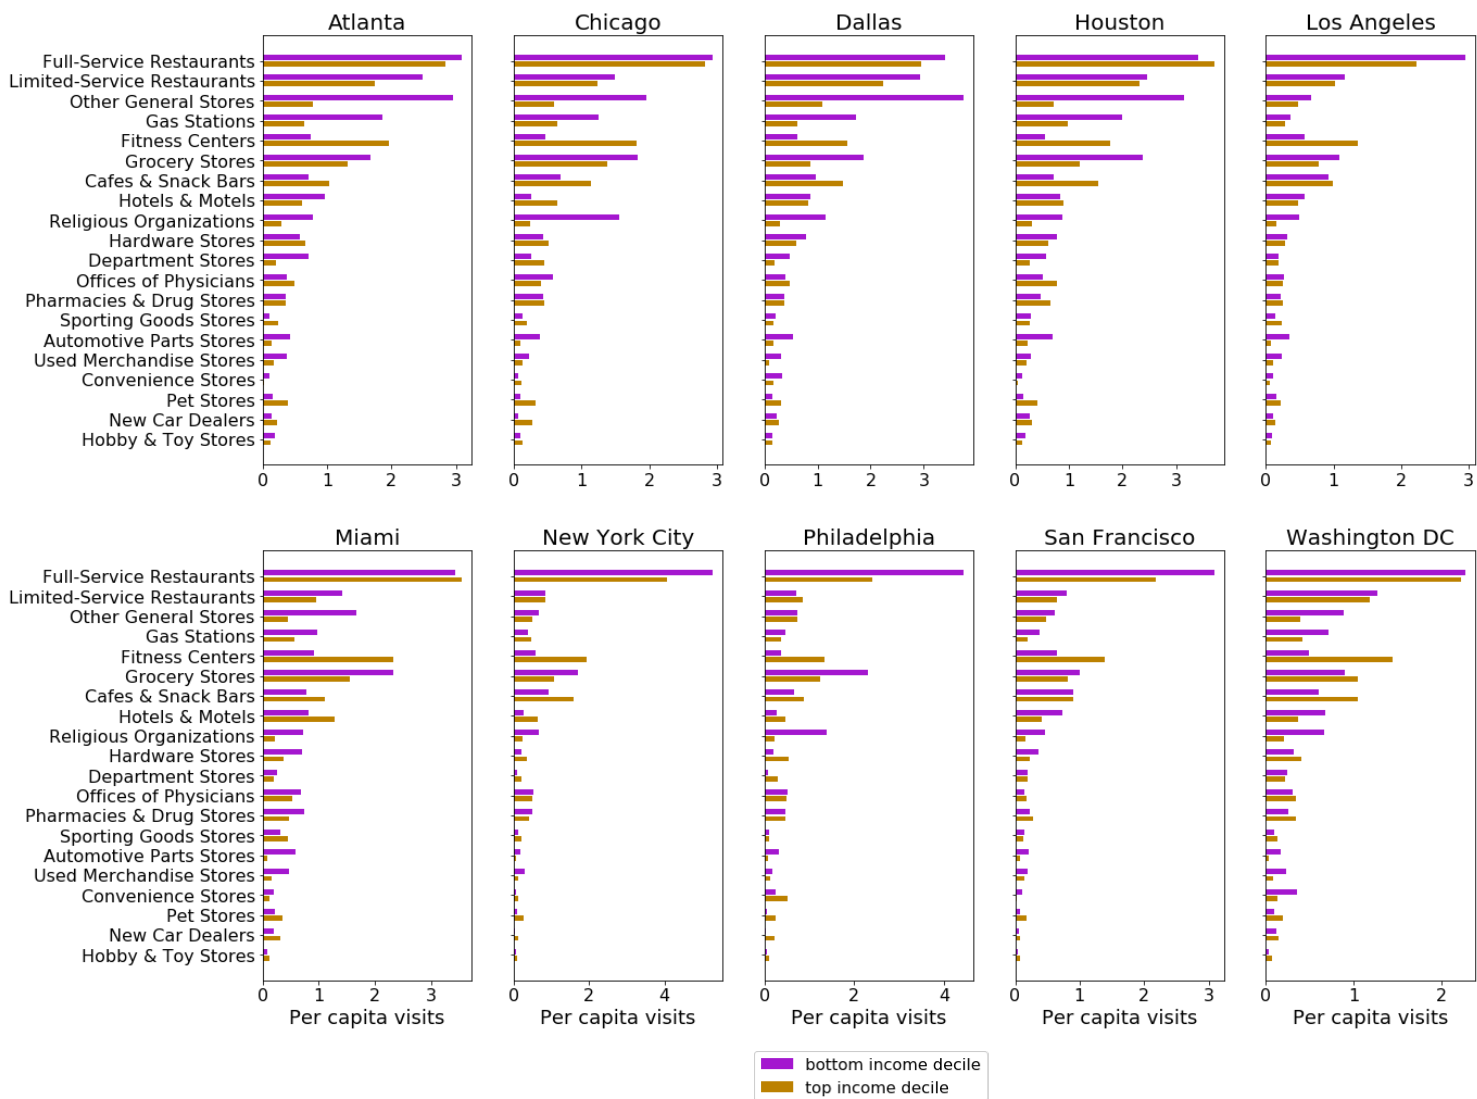

**Figure S3:** Visits per capita from CBGs in the bottom- (purple) and top- (gold) income deciles to each POI category, accumulated from March 1–May 2, 2020. See Methods M5 for details.

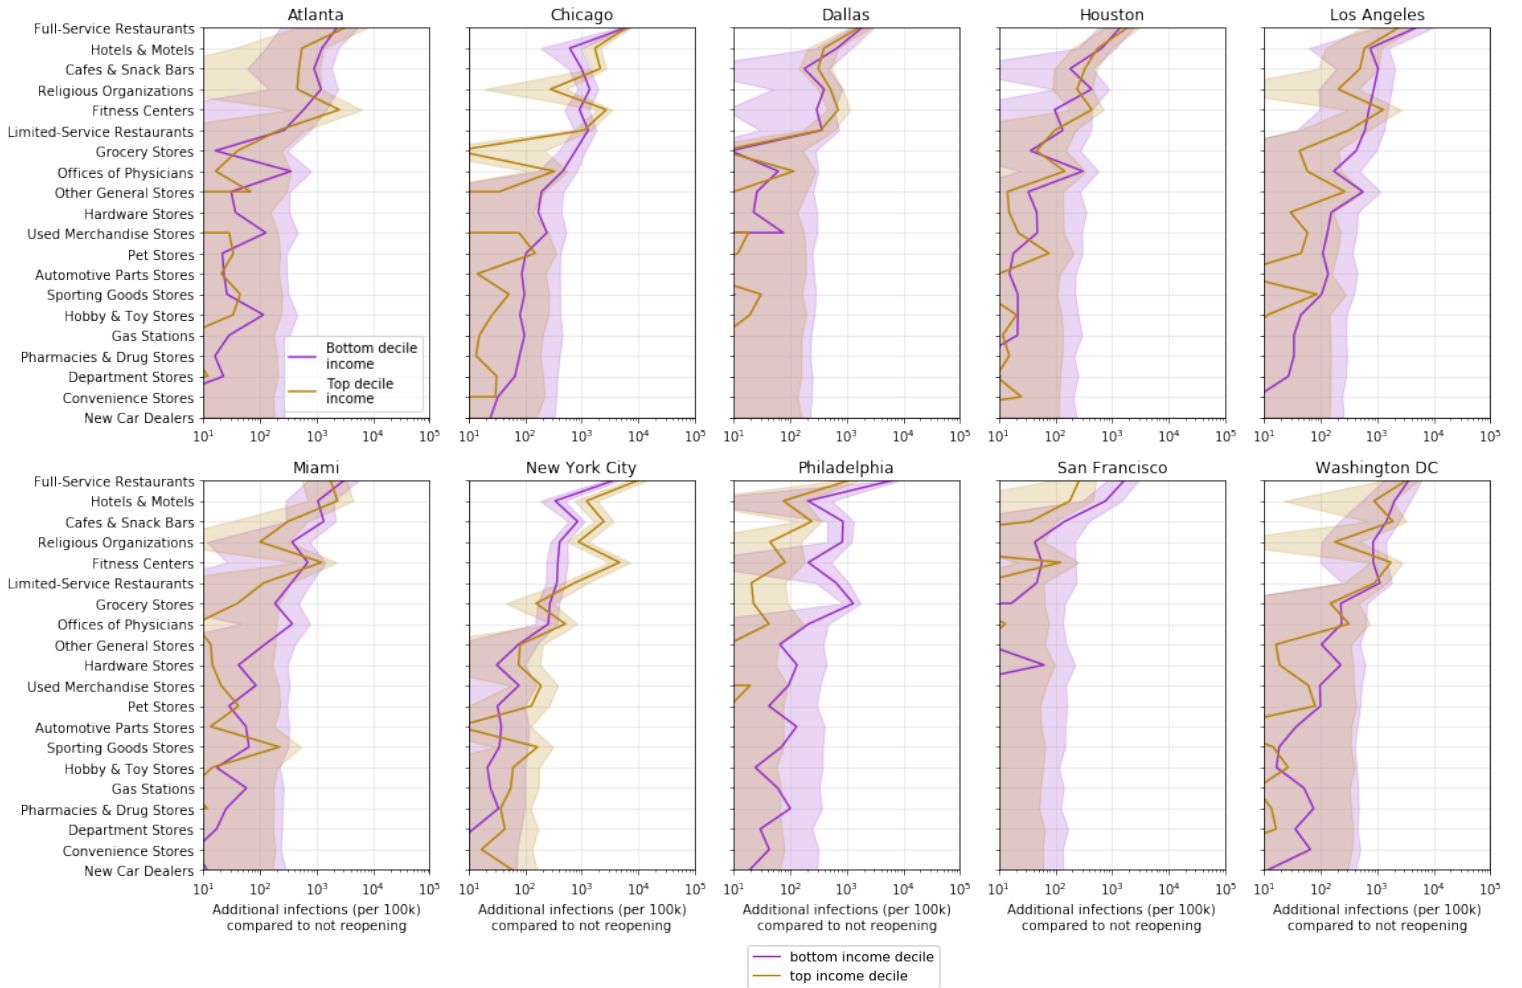

**Figure S4:** Model predicted additional infections (per 100k population) from reopening each POI category, for CBGs in the top- (gold) and bottom- (purple) income deciles. Predicted reopening impacts are generally worse for lower-income CBGs. Shaded regions denote 2.5th and 97.5th percentiles across sampled parameters and stochastic realizations. See Methods M5 for details.

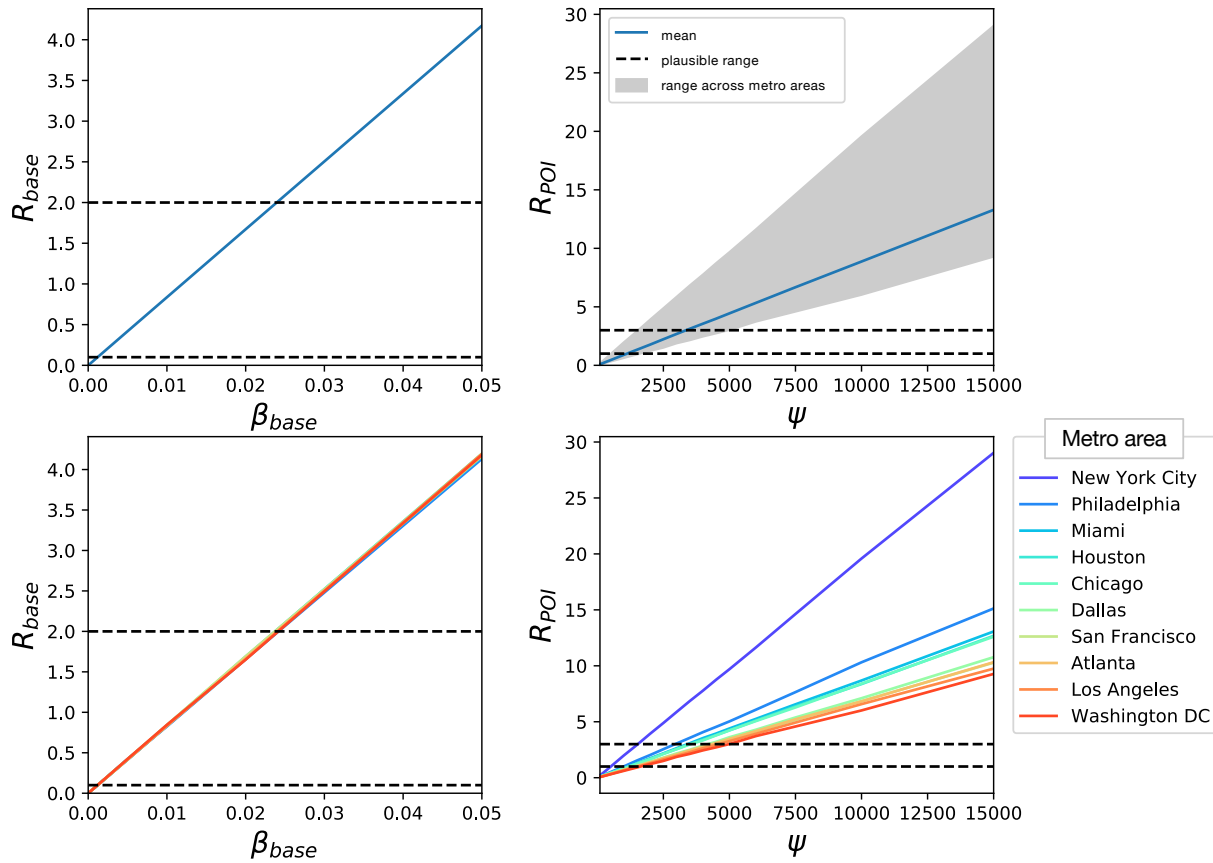

**Figure S5:**  $R_{base}$  and  $R_{POI}$  implied by model parameter settings, where  $\psi$  is the scaling factor for POI transmission and  $\beta_{base}$  is the base CBG transmission rate. In the top two plots, dotted black lines denote plausible ranges from prior work, the blue line shows the mean across metro areas, and the grey shaded area indicates the range across metro areas.  $R_{base}$  does not vary across metro areas because it does not depend on metro area-specific social activity. The bottom two plots show the same results broken down by metro area. See Methods M4.1 for details.



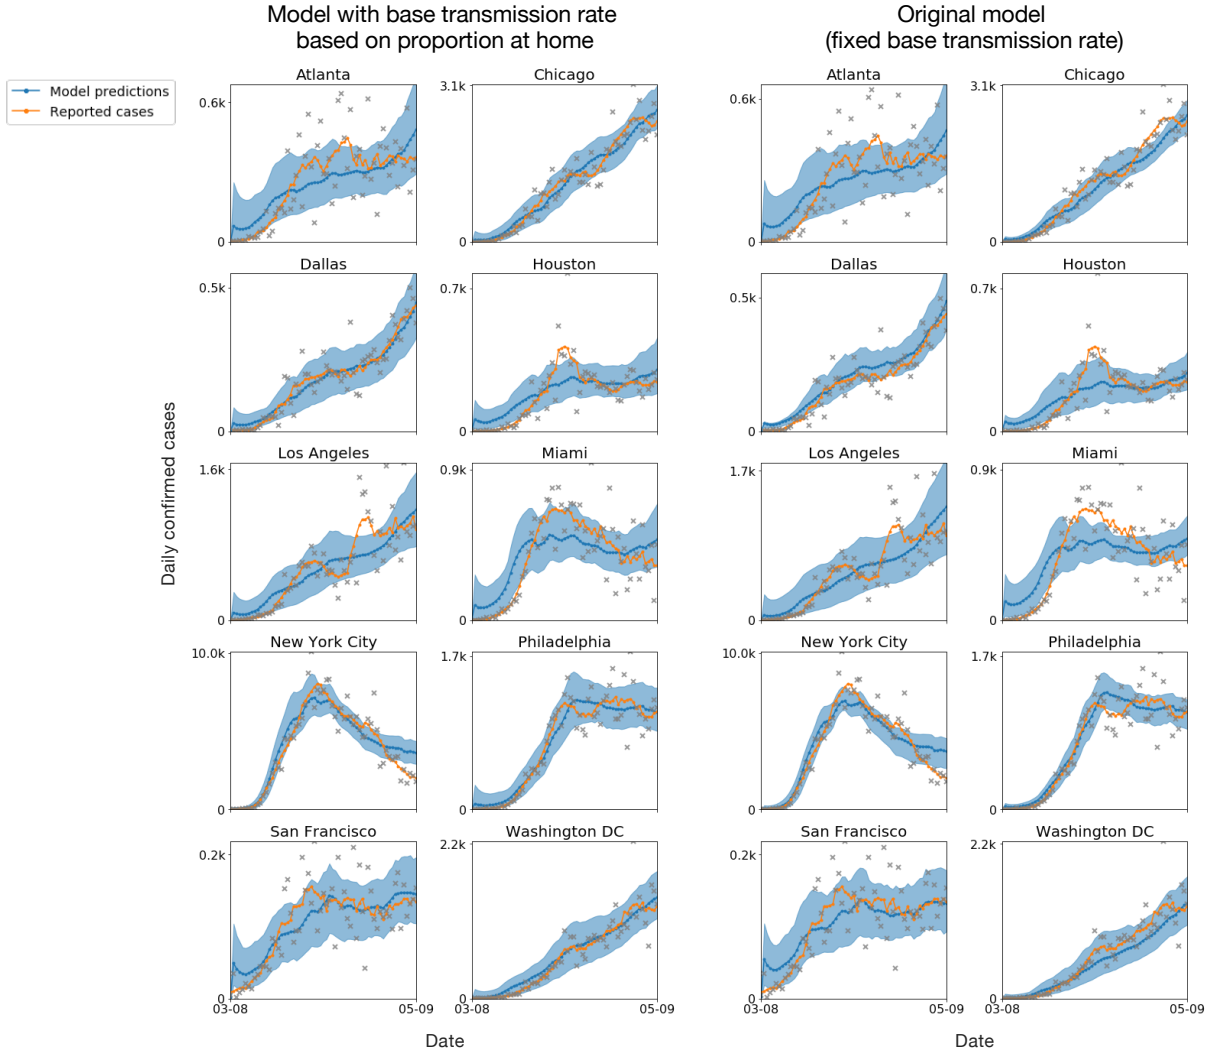

**Figure S6:** Sensitivity analysis of time-varying base transmission rate. Instead of assuming a fixed base transmission rate, we designed an alternate model where each CBG’s base transmission rate varied with the proportion of the CBG that was at home at time  $t$ ; see SI Methods 2.1 for details. We found that the predictions of this modified model (left) were highly similar to the predictions of the original model (right). The x-axis is the same across plots, showing the date from March 8–May 9, 2020. The grey x’s represent the daily reported cases; since they tend to have great variability, we also show the smoothed weekly average (orange). Shaded regions denote 2.5th and 97.5th percentiles across sampled parameters and stochastic realizations.

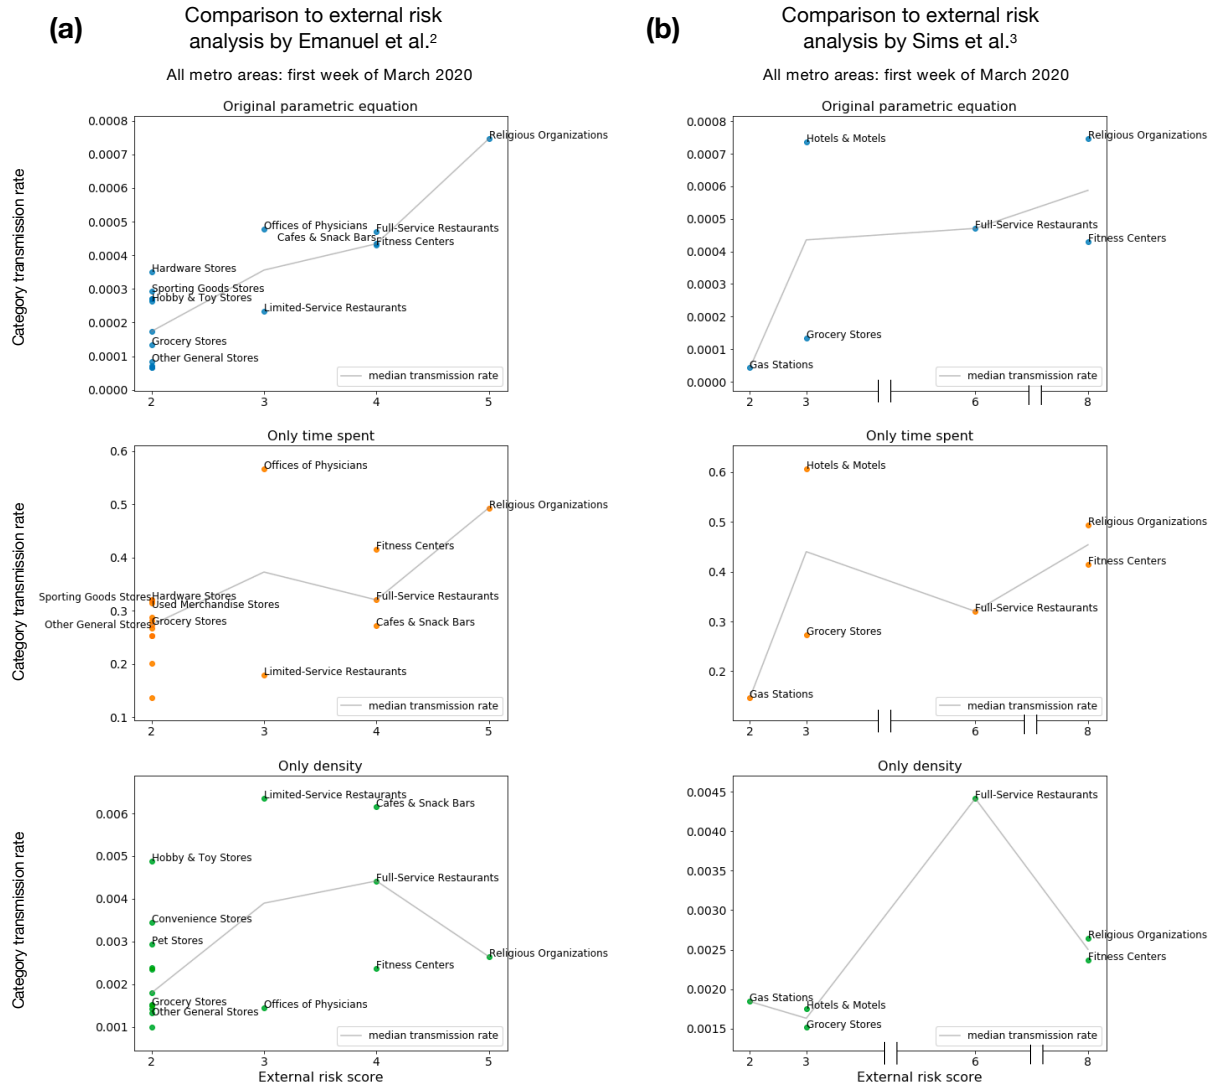

**Figure S7:** Sensitivity analysis on the parametric form for POI transmission rate. Our model assumes that POI transmission rates depend on two factors: time spent at the POI and the density of individuals per square foot. We tested this assumption by computing an alternate transmission rate that only included time spent (removing density) and another version that only included density (removing time spent); see SI Methods 2.2 for details. We found that the relative risks predicted by our original transmission rate formula concurred best with the assessments of risk proposed by independent epidemiological experts.<sup>2,3</sup> The x-axis represents their proposed risk scores; some scores are missing (e.g., 3 and 4 on the right) because there was no overlap between the categories they assigned that score and categories that we analyzed. The y-axis represents each category’s predicted average transmission rate in the first week of March, taking the median over metro areas. Due to space constraints, only a subset of the categories scored at 2 by Emanuel et al. (left) are labeled – the labels are reserved for either the 2 most visited categories in this group (Grocery Stores and Other General Stores) and/or the 3 categories with highest predicted transmission rates within the group.

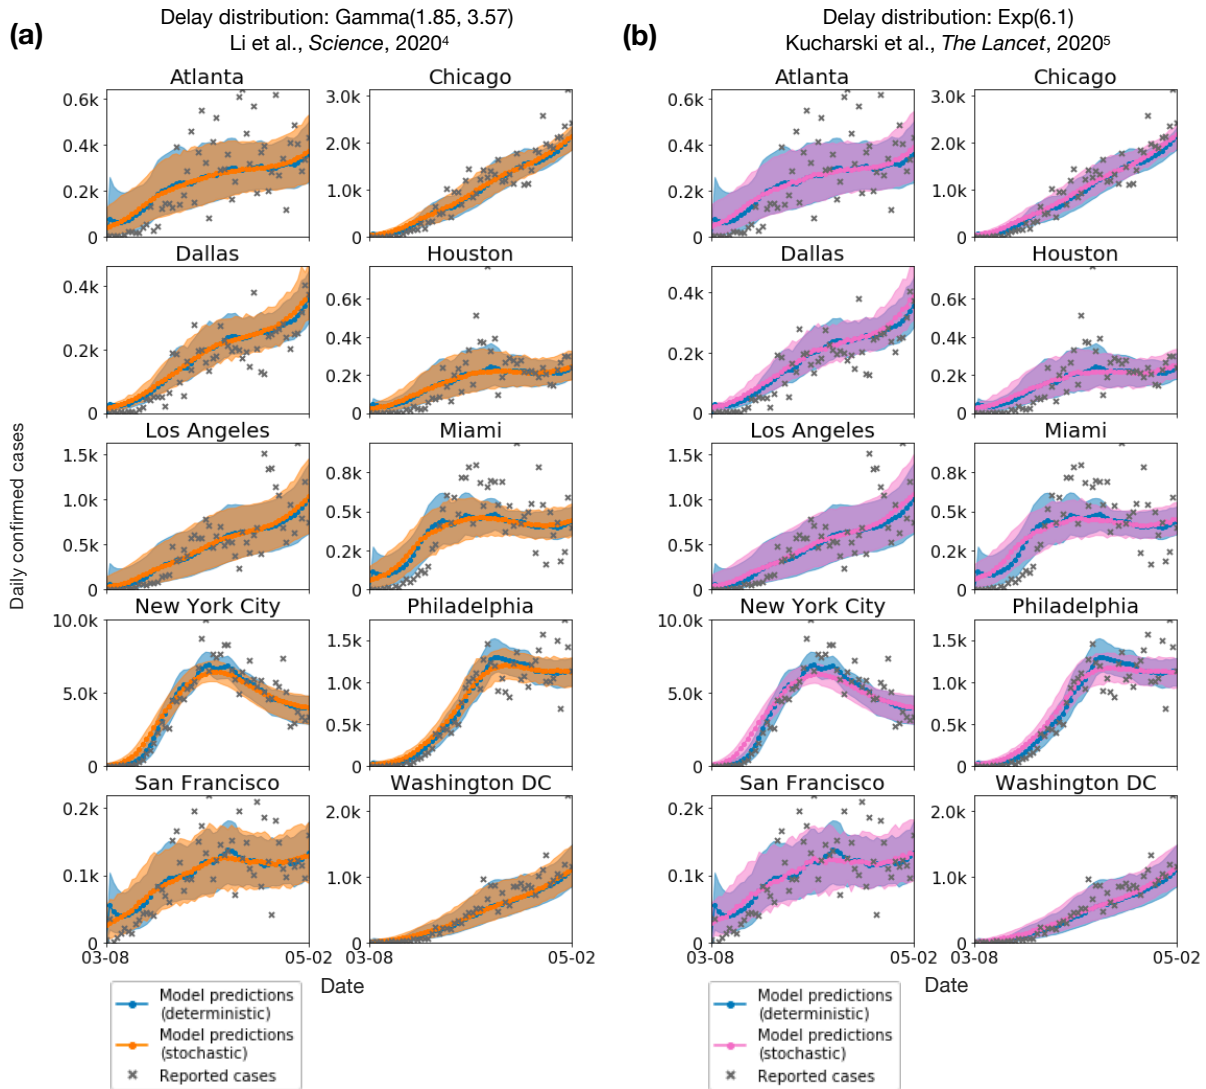

**Figure S8:** Sensitivity analysis on confirmation rate and delay. Instead of assuming a constant confirmation rate and constant infectious-to-confirmation delay on cases, we tested sampling the number of confirmed cases and delay distribution stochastically. The number of confirmed cases was sampled from a Binomial distribution, and we tried two different delay distributions that were fitted on empirical line list data, (a) Li et al.<sup>4</sup> and (b) Kucharski et al.<sup>5</sup> (see SI Methods 2.3 for details). For both delay distributions, we find that model predictions under the stochastic setting are highly similar to the predictions made under the constant rate and delay setting (labeled as “deterministic” in the plot). Note that the “deterministic” and “stochastic” labels only apply to the computation of confirmed cases from infectious individuals to confirmed cases; the underlying SEIR models are all stochastic, as described in Methods M3. The x-axis is the same across plots, showing the date from March 8–May 2, 2020. Shaded regions denote 2.5th and 97.5th percentiles across sampled parameters and stochastic realizations.

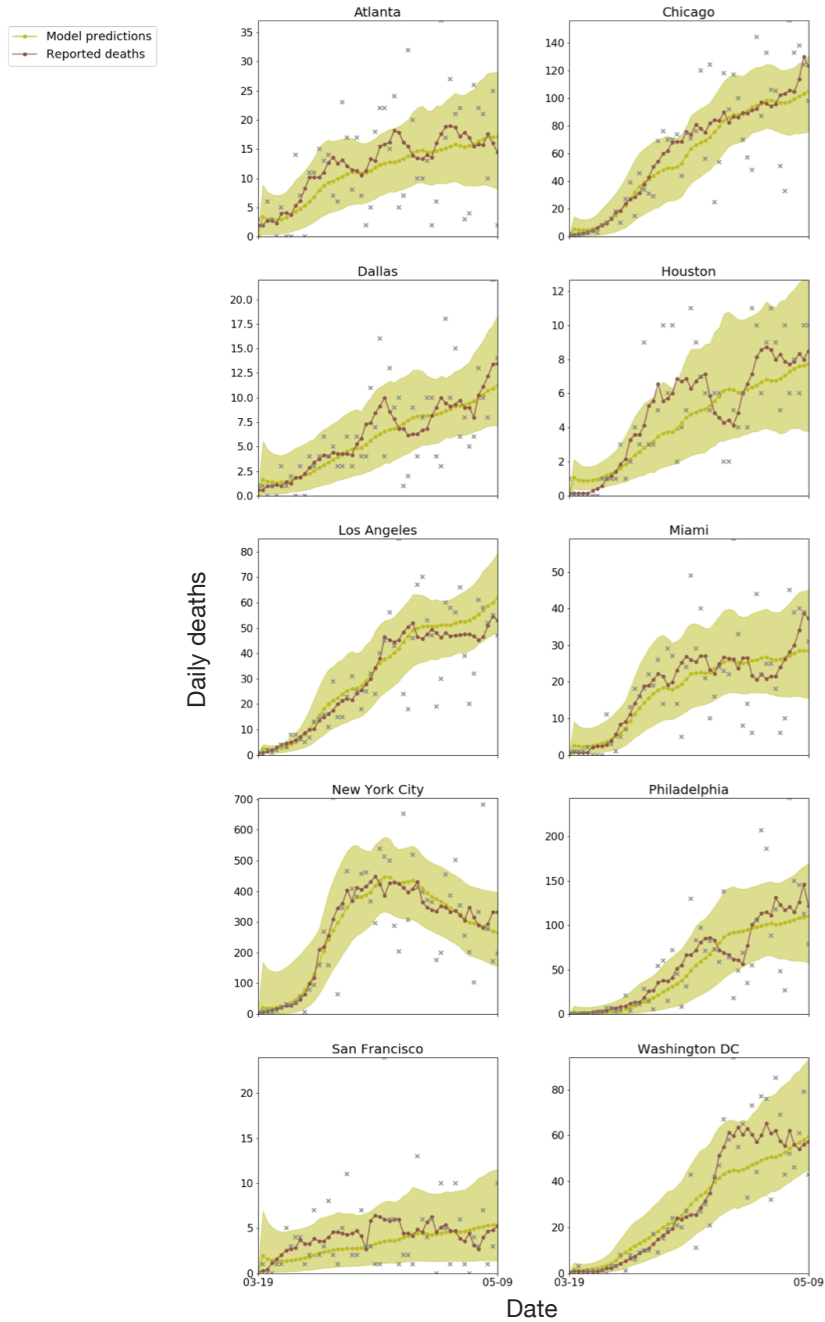

**Figure S9:** Predicted (green) and true (brown) daily death counts, when our model is calibrated on observed *death* counts. The x-axis is the same across plots, showing the date from March 19–May 9, 2020. The grey x’s represent the daily reported deaths; since they tend to have great variability, we also show the smoothed weekly average (brown). Shaded regions denote 2.5th and 97.5th percentiles across sampled parameters and stochastic realizations. See SI Methods 2.4 for details.

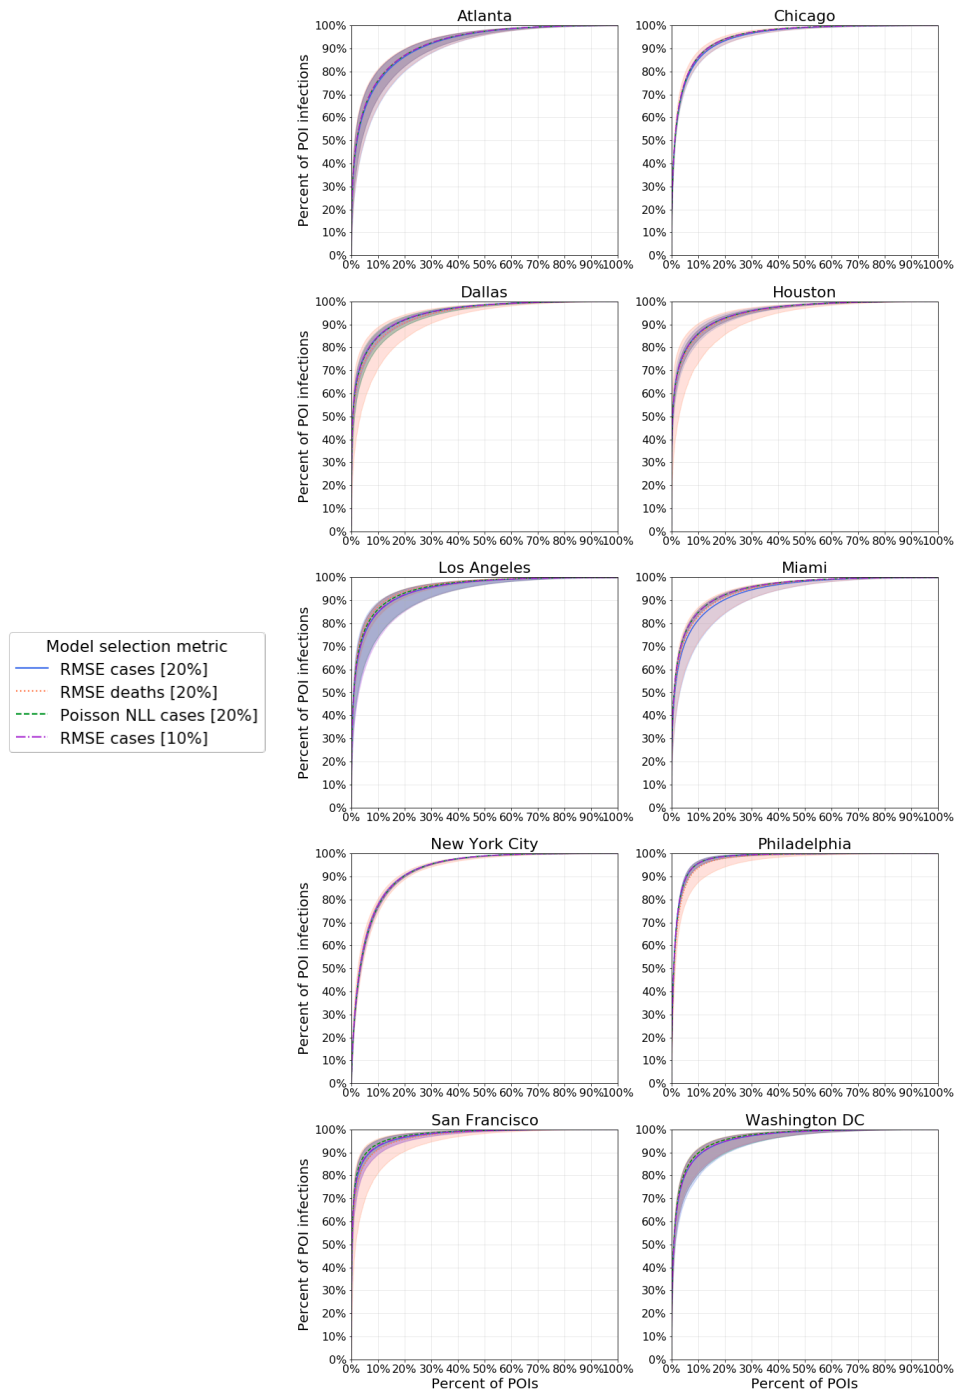

**Figure S10:** A small fraction of POIs account for a large fraction of the predicted infections at POIs. We additionally conducted a sensitivity analysis on which metric was used for model calibration (SI Methods 2.4) and show that this key finding holds across all metrics. For each metric, we ran the fitted models on the observed mobility data from March 1–May 2, 2020 and recorded the predicted number of infections that occurred at each POI (Methods M5). Shaded regions denote 2.5th and 97.5th percentiles across sampled parameters and stochastic realizations.

## Chicago metro area

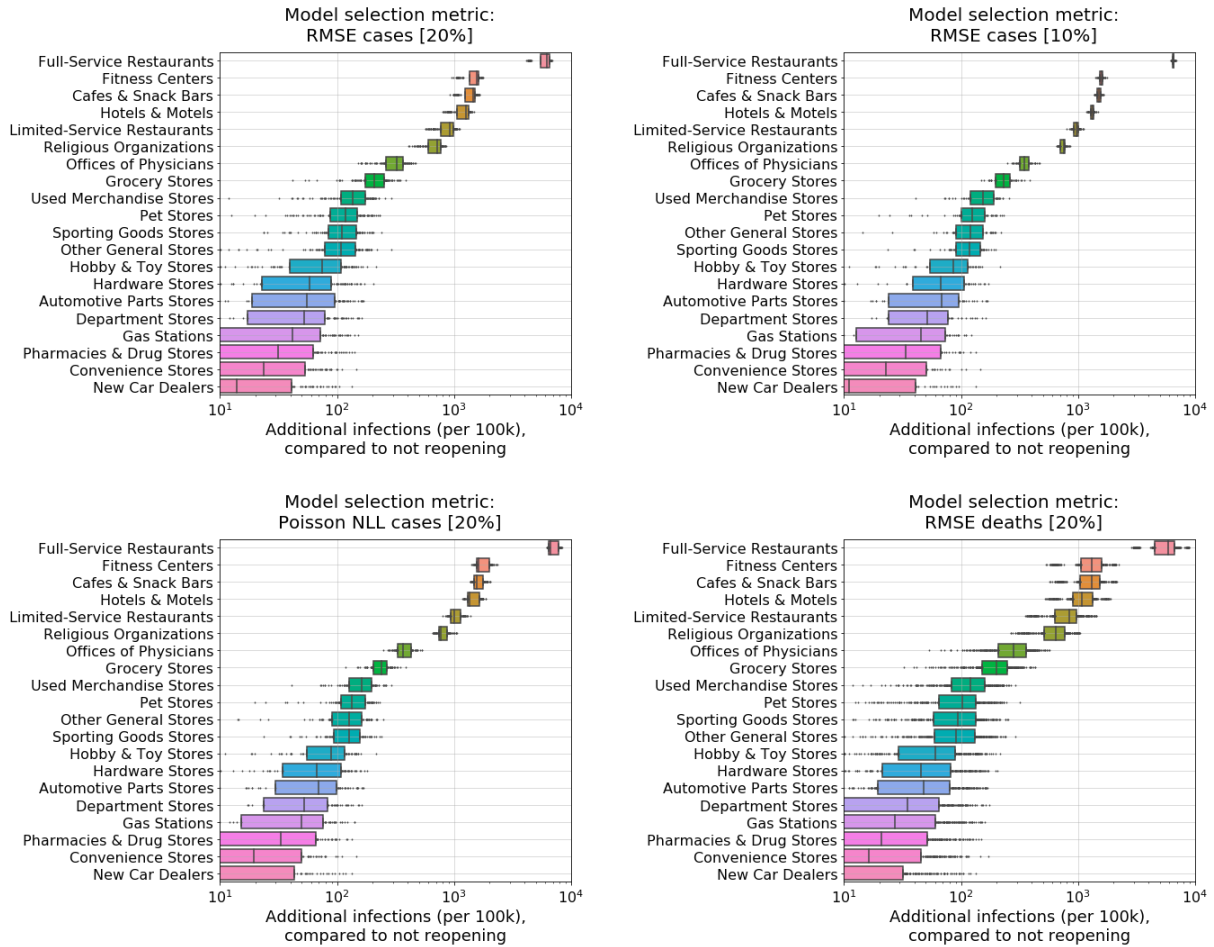

**Figure S11:** Sensitivity analysis on model calibration metrics and reopening risks. We conducted a sensitivity analysis on which metric was used for model calibration, comparing our default metric (top left) to three other metrics (SI Methods 2.4). We ran our reopening experiments forward with the model parameters selected by each metric (Methods M5). The predicted ranking of risk from reopening different POI categories remains consistent across all metrics. All boxes denote the interquartile range across parameter sets and stochastic realizations, with data points outside the range individually shown. For the Chicago metro area, with 30 stochastic realizations per parameter set, our original metric (top left) selected 4 parameter sets ( $N = 120$ ); RMSE cases with 10% threshold (top right) selected 2 parameter sets ( $N = 60$ ); Poisson negative log-likelihood (bottom left) selected 3 parameter sets ( $N = 90$ ); and RMSE deaths (bottom right) selected 12 parameter sets ( $N = 360$ ).

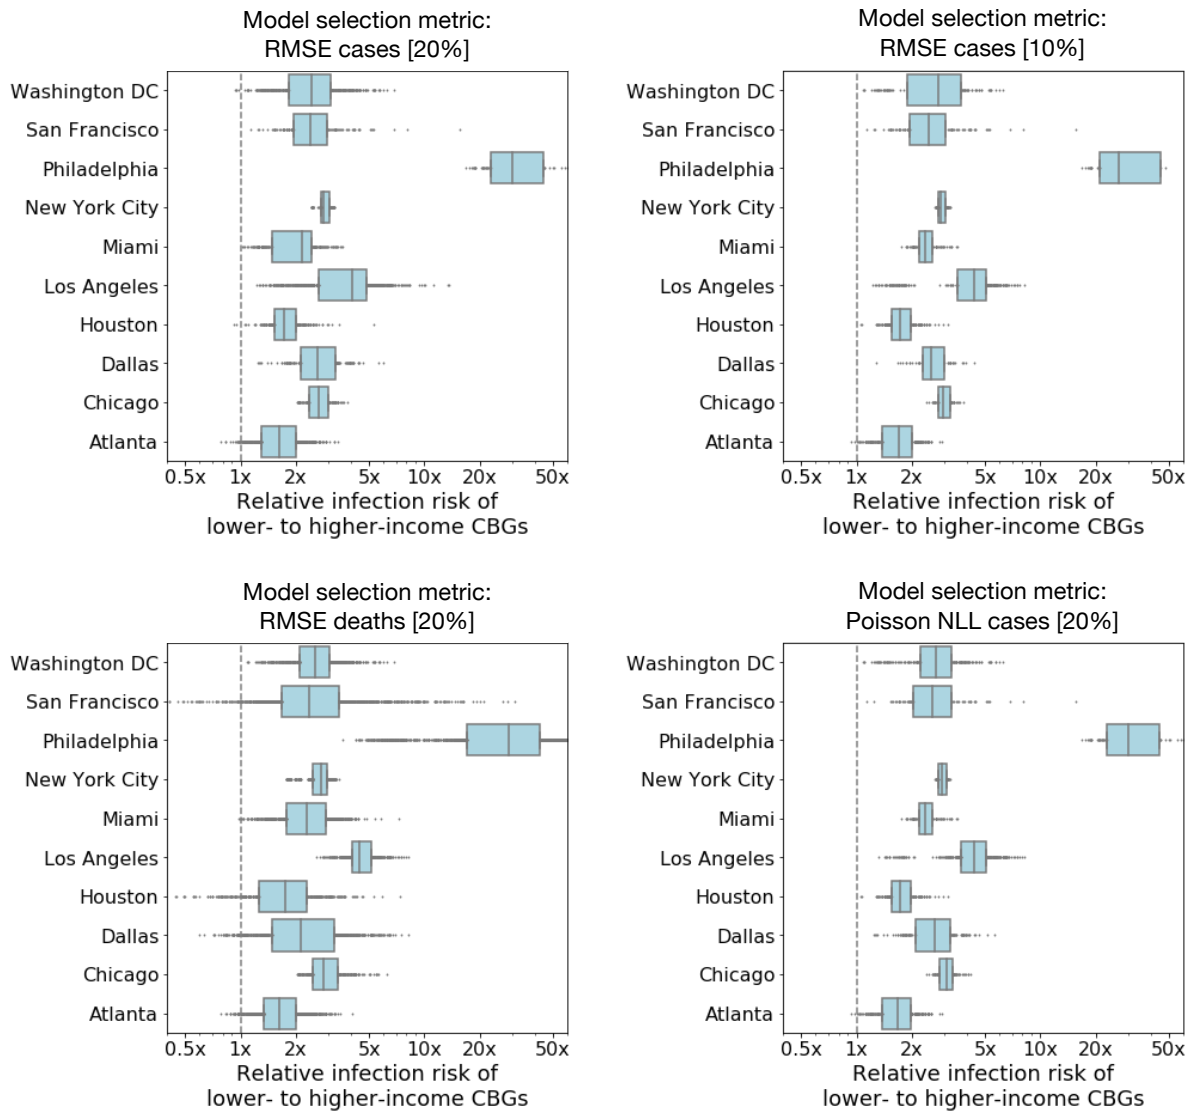

**Figure S12:** Sensitivity analysis on model calibration metrics and predicted socioeconomic disparities. We conducted a sensitivity analysis on which metric was used for model calibration, comparing our default metric (top left) to three other metrics (SI Methods 2.4). We then analyzed the socioeconomic disparities in each metro area predicted by the model parameters selected by each metric. The predicted disparities remain remarkably consistent across all metrics, and, for every metric, the best fit models predict that lower-income CBGs are at higher infection risk. All boxes denote the interquartile range across parameter sets and stochastic realizations, with data points outside the range individually shown. Across metro areas, with 30 stochastic realizations per parameter set, our original metric (top left) selected 97 parameter sets ( $N = 2,910$ ); RMSE cases with 10% threshold (top right) selected 45 parameter sets ( $N = 1,350$ ); Poisson negative log-likelihood (bottom left) selected 52 parameter sets ( $N = 1,560$ ); and RMSE deaths (bottom right) selected 251 parameter sets ( $N = 7,530$ ).

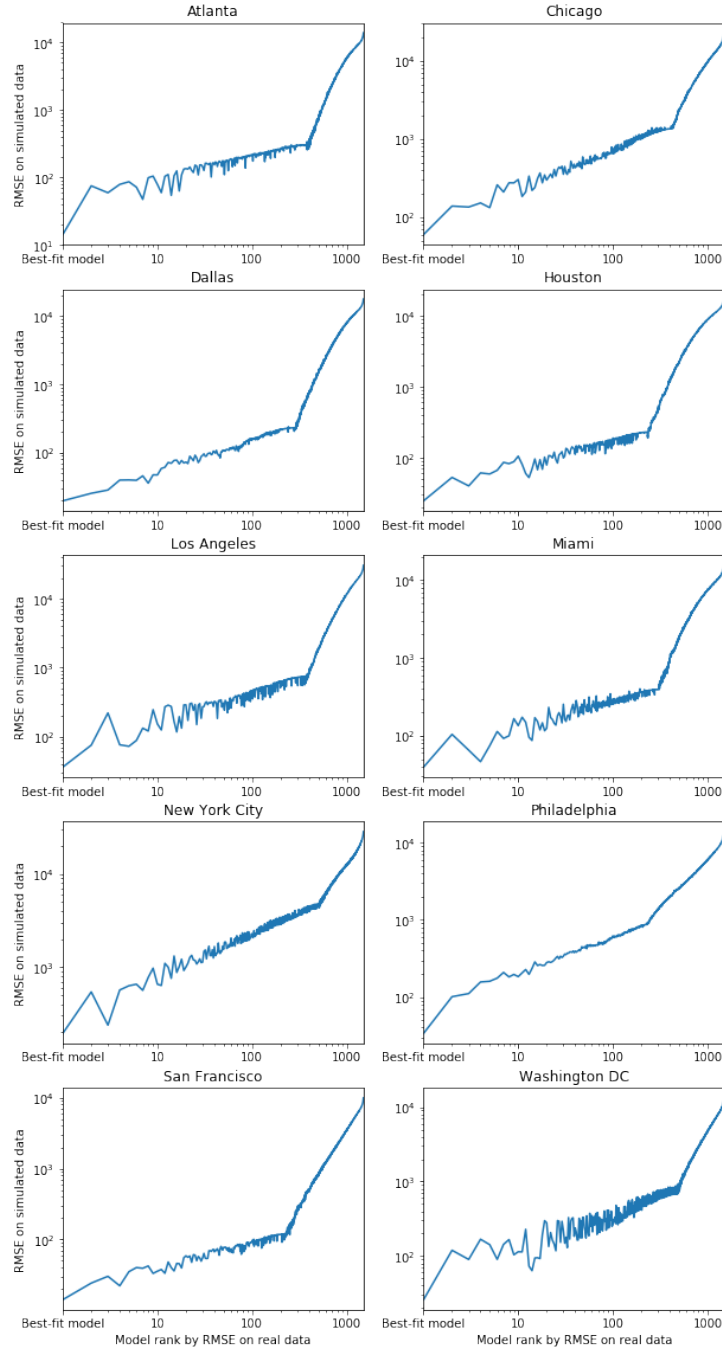

**Figure S13:** Assessing model identifiability on simulated data. The x-axis ranks parameter settings by how well they fit *real* data (measured by RMSE to daily cases). The y-axis plots plots RMSE on *simulated* case count data generated using the best-fit parameter settings. For all 10 metro areas, the leftmost point—which corresponds to best-fit parameter setting, i.e., the parameters we use as ground truth for the simulated data—also obtains the lowest loss on the simulated data. This demonstrates that the model and fitting procedure can correctly recover the true parameters in simulated data. SI Methods 2.5 provides more details.



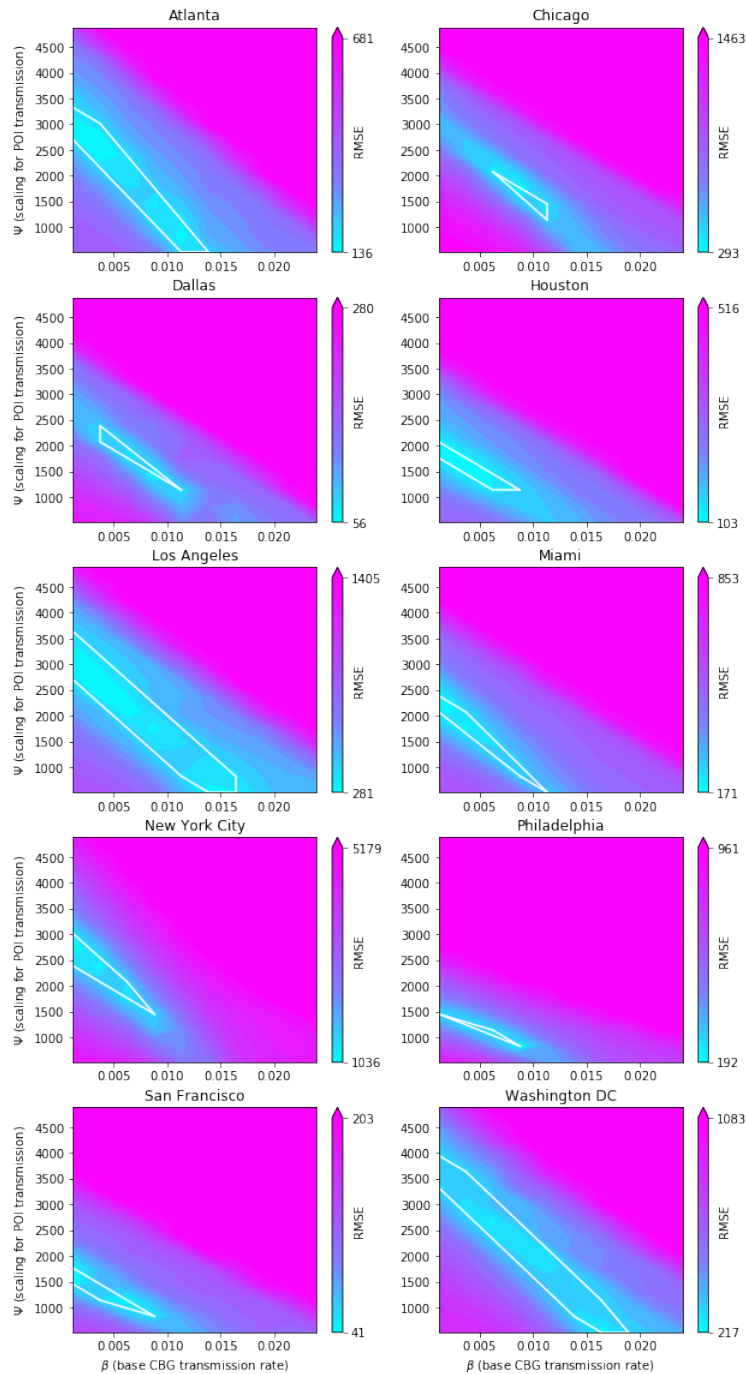

**Figure S14:** RMSE on daily case count data as a function of parameters  $\psi$  (y-axis), which scales POI transmission rates, and  $\beta_{\text{base}}$  (x-axis), which is the base CBG transmission rate. Color indicates the RMSE, normalized such that blue represents the RMSE of the best-fit model. The white polygon shows the convex hull of the parameter settings used to generate results: i.e., all models with an RMSE less than  $1.2\times$  that of the best-fit model. For all parameter combinations, we take the minimum RMSE over  $p_0$ . SI Methods 2.5 provides more details.

### Atlanta metro area

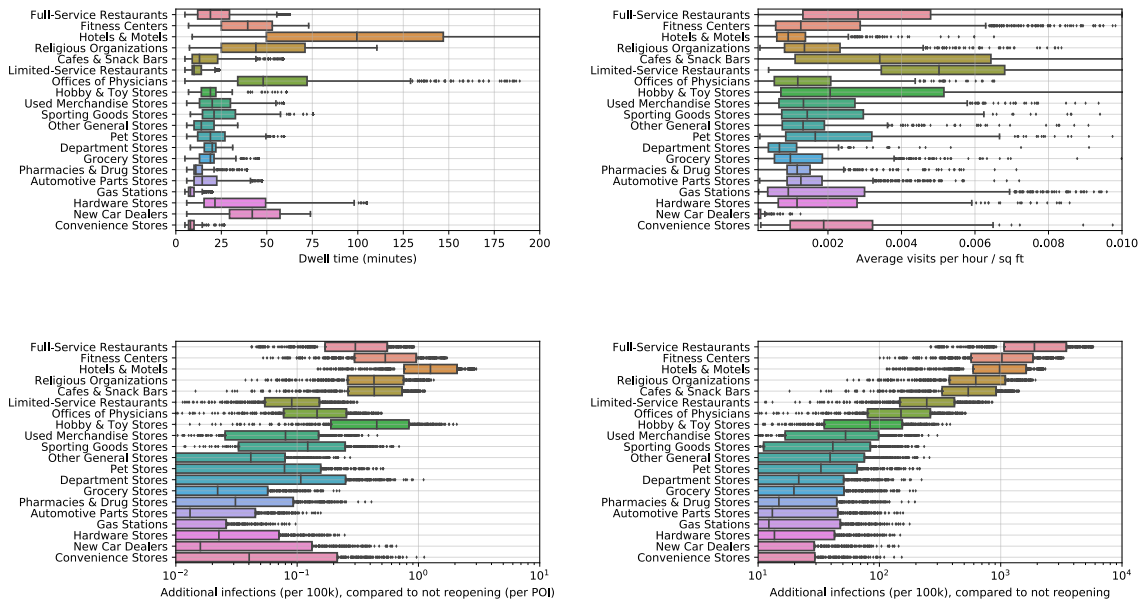

**Figure S15:** POI attributes in Atlanta metro area. The top two plots display quantities from the mobility data: the dwell time and the average number of hourly visitors divided by POI area. Each point represents one POI; boxes depict the interquartile range across POIs, with data points outside the range individually shown. The bottom two plots show model predictions for the increase in infections from reopening a POI category: per POI (left bottom) and for the category as a whole (right bottom). Each point represents one model realization; boxes depict the interquartile range across realizations, with data points outside the range individually shown. In Atlanta, we model 39,411 POIs in total, and we sample 16 parameter sets and 30 stochastic realizations ( $N=480$ ).

### Chicago metro area

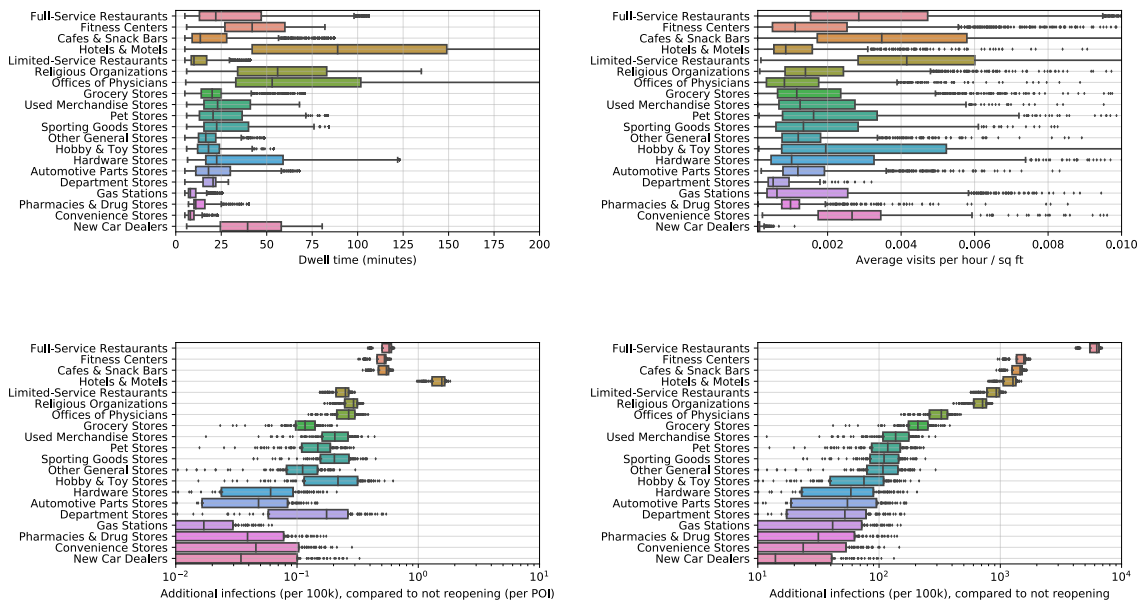

**Figure S16:** POI attributes in the Chicago metro area. See Figure S15 for details. In Chicago, we model 62,420 POIs in total, and we sample 4 parameter sets and 30 stochastic realizations ( $N=120$ ).

### Dallas metro area

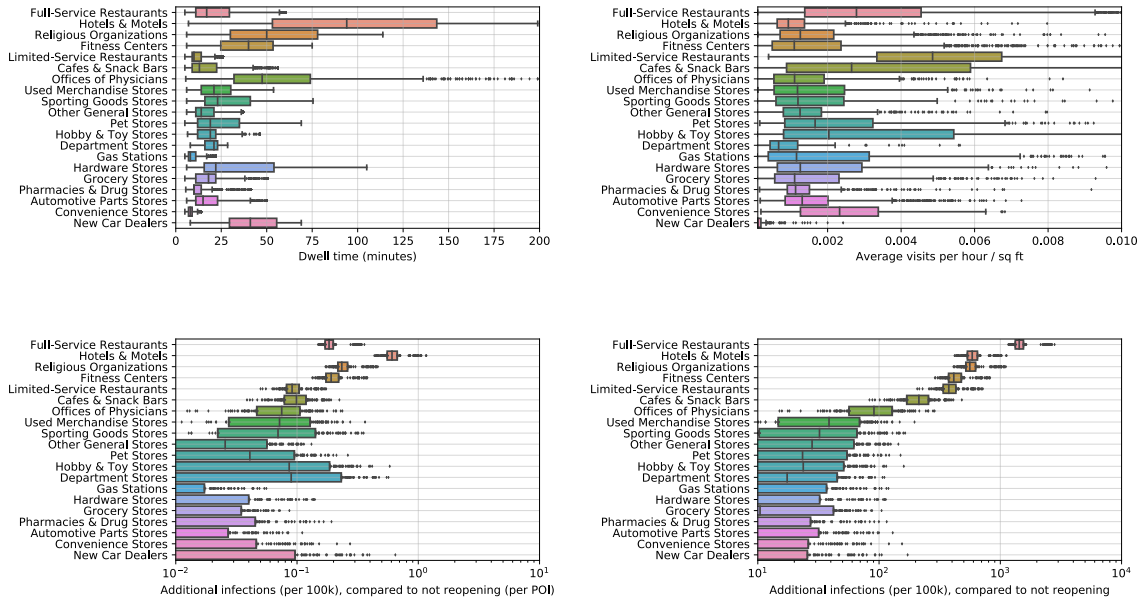

**Figure S17:** POI attributes in the Dallas metro area. See Figure S15 for details. In Dallas, we model 52,999 POIs in total, and we sample 5 parameter sets and 30 stochastic realizations (N=150).

### Houston metro area

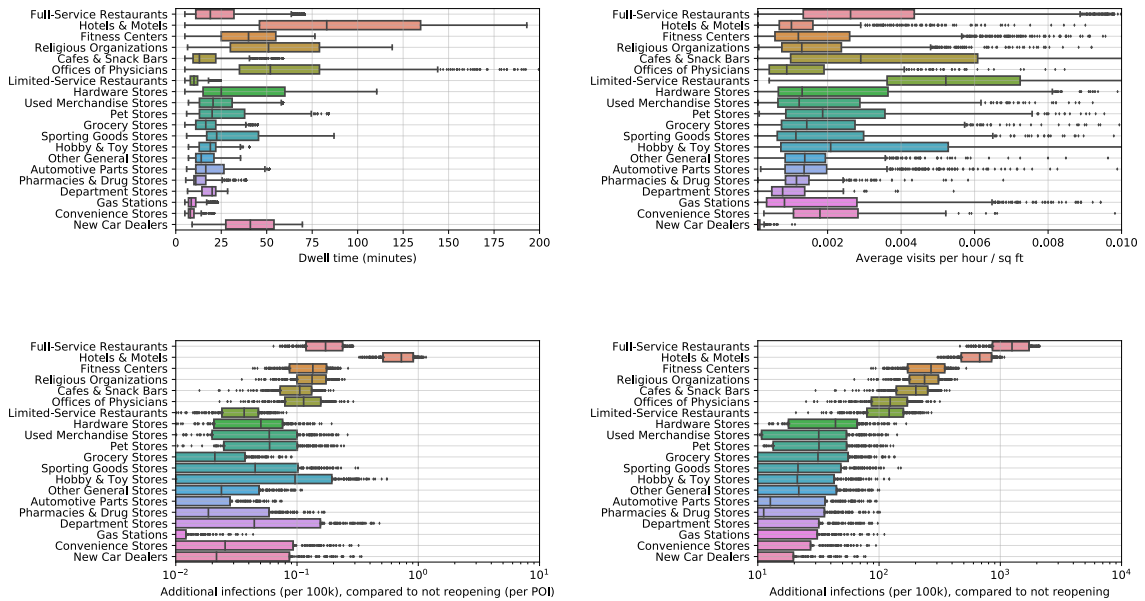

**Figure S18:** POI attributes in the Houston metro area. See Figure S15 for details. In Houston, we model 49,622 POIs in total, and we sample 8 parameter sets and 30 stochastic realizations (N=240).

### Los Angeles metro area

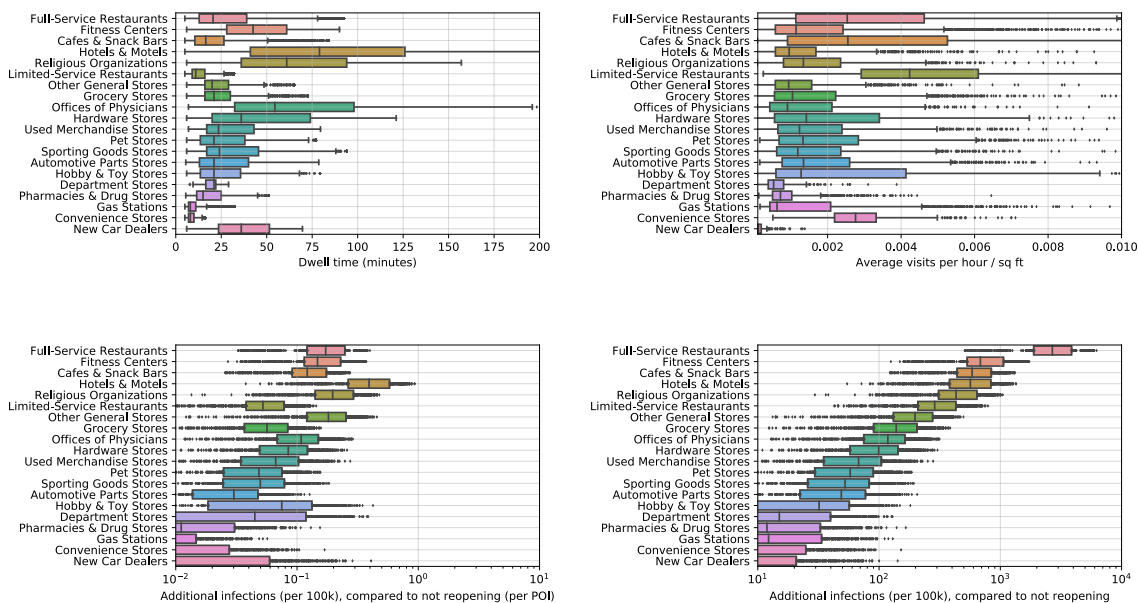

**Figure S19:** POI attributes in Los Angeles metro area. See Figure S15 for details. In Los Angeles, we model 83,954 POIs in total, and we sample 25 parameter sets and 30 stochastic realizations (N=750).

### Miami metro area

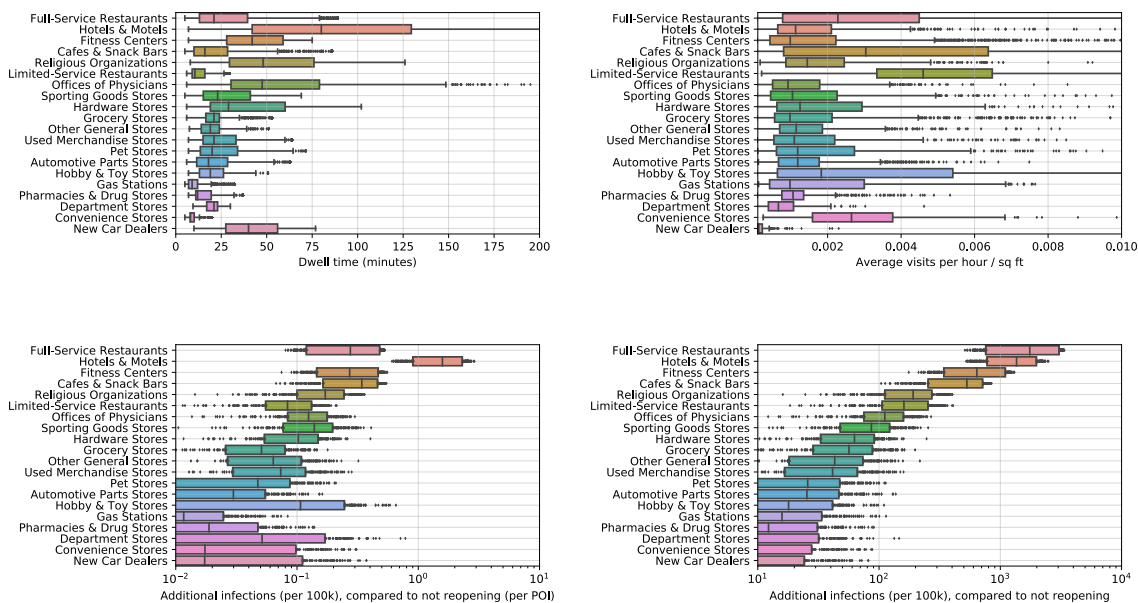

**Figure S20:** POI attributes in Miami metro area. See Figure S15 for details. In Miami, we model 40,964 POIs in total, and we sample 7 parameter sets and 30 stochastic realizations (N=210).

### New York metro area

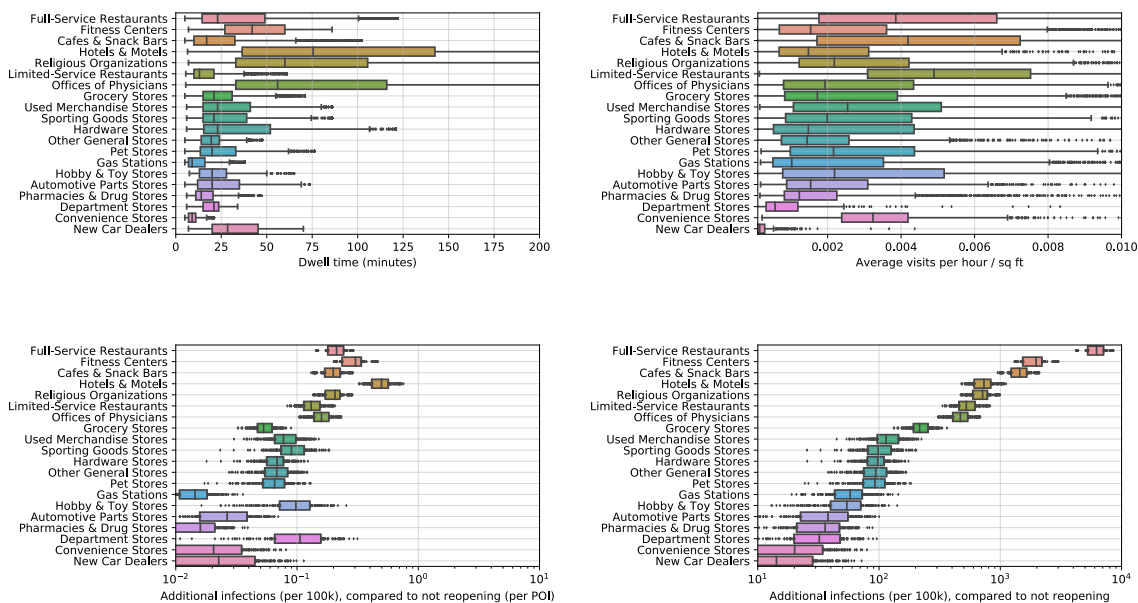

**Figure S21:** POI attributes in New York metro area. See Figure S15 for details. In New York, we model 122,428 POIs in total, and we sample 7 parameter sets and 30 stochastic realizations (N=210).

### Philadelphia metro area

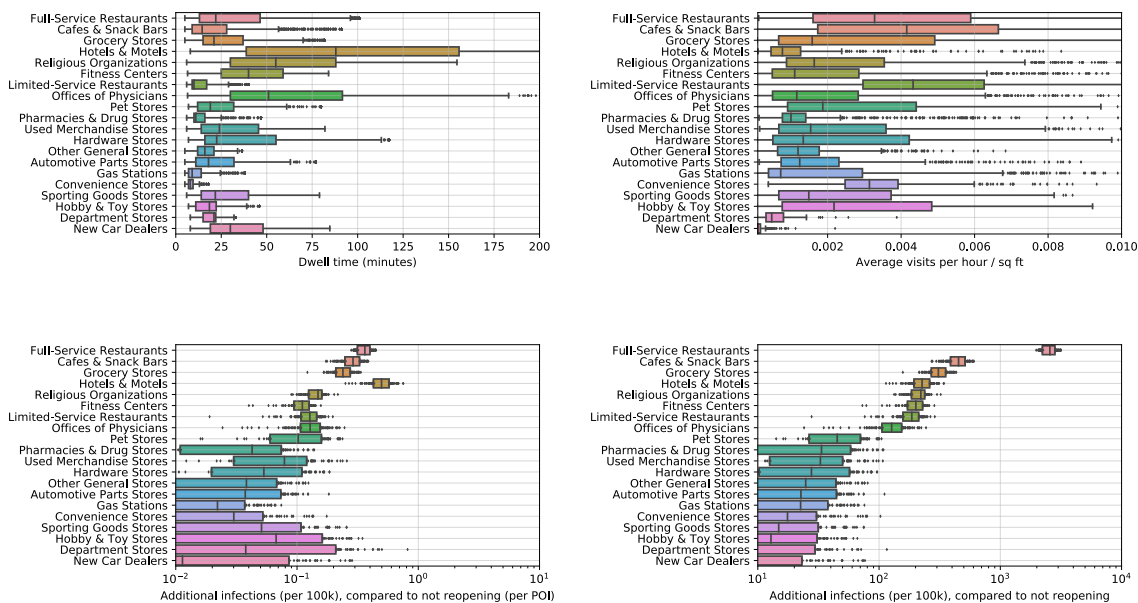

**Figure S22:** POI attributes in Philadelphia metro area. See Figure S15 for details. In Philadelphia, we model 37,951 POIs in total, and we sample 3 parameter sets and 30 stochastic realizations (N=90).

### San Francisco metro area

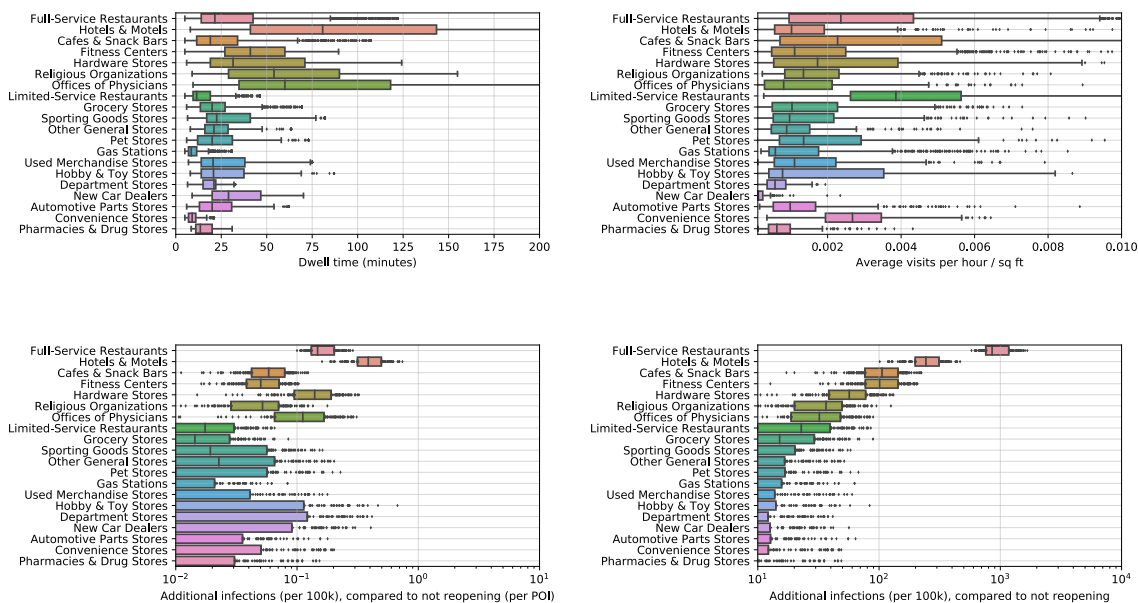

**Figure S23:** POI attributes in San Francisco metro area. See Figure S15 for details. In San Francisco, we model 28,713 POIs in total, and we sample 5 parameter sets and 30 stochastic realizations (N=150).

### Washington DC metro area

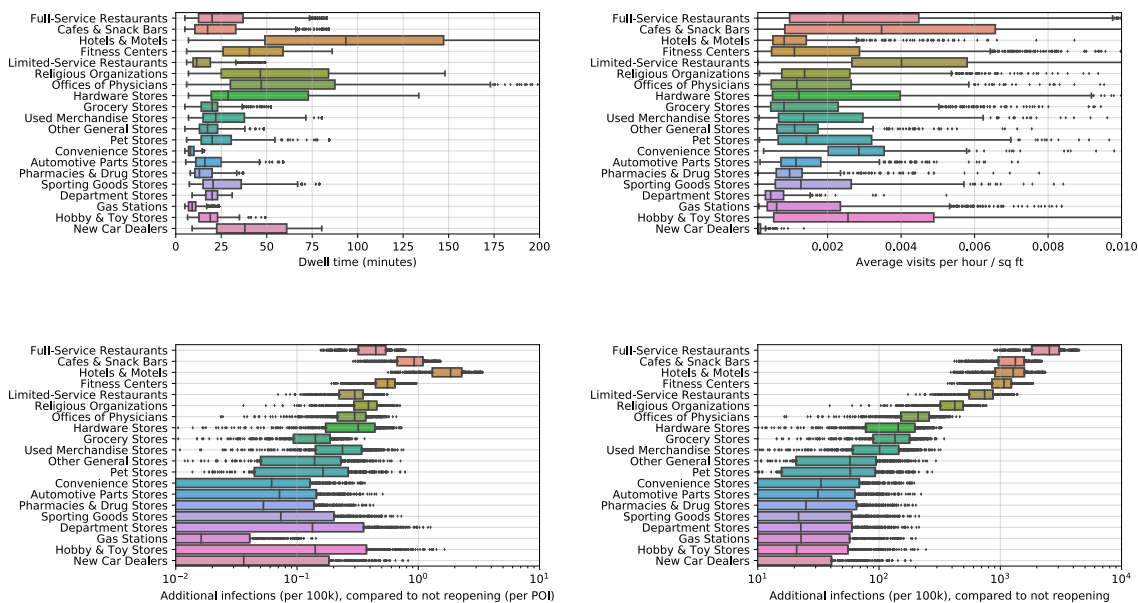

**Figure S24:** POI attributes in Washington DC metro area. See Figure S15 for details. In DC, we model 34,296 POIs in total, and we sample 17 parameter sets and 30 stochastic realizations (N=510).

## Supplementary References

1. Google. COVID-19 community mobility reports (2020). Available at <https://google.com/covid19/mobility/>.
2. Emanuel, E. J., Phillips, J. P. & Popescu, S. COVID-19 Activity Risk Levels (2020). Available at <http://www.ezekielemanuel.com/writing/all-articles/2020/06/30/covid-19-activity-risk-levels>.
3. DesOrmeau, T. From hair salons to gyms, experts rank 36 activities by coronavirus risk level. *MLive* (2020). Available at <https://www.mlive.com/public-interest/2020/06/from-hair-salons-to-gyms-experts-rank-36-activities-by-coronavirus-risk-level.html>.
4. Li, R. *et al.* Substantial undocumented infection facilitates the rapid dissemination of novel coronavirus (SARS-CoV2). *Science* **368**, 489–493 (2020).
5. Kucharski, A. J. *et al.* Early dynamics of transmission and control of COVID-19: a mathematical modelling study. *The Lancet Infectious Diseases* **20**, 553 – 558 (2020).
6. Verity, R. *et al.* Estimates of the severity of coronavirus disease 2019: a model-based analysis. *The Lancet* **20**, 669–677 (2020).
7. Deming, W. E. & Stephan, F. F. On a least squares adjustment of a sampled frequency table when the expected marginal totals are known. *The Annals of Mathematical Statistics* **11**, 427–444 (1940).
8. SafeGraph. Measuring and Correcting Sampling Bias in Safegraph Patterns for More Accurate Demographic Analysis (2020). Available at <https://safegraph.com/blog/measuring-and-correcting-sampling-bias-for-accurate-demographic-analysis>.
9. SafeGraph. Places Manual (2020). Available at <https://docs.safegraph.com/docs/places-manual#section-visitor-home-cbgs>.
10. Benzell, S. G., Collis, A. & Nicolaides, C. Rationing social contact during the COVID-19 pandemic: Transmission risk and social benefits of US locations. *Proceedings of the National Academy of Sciences* (2020).
11. Bishop, Y. M., Fienberg, S. E. & Holland, P. W. Discrete multivariate analysis (1975).
12. Birkin, M. & Clarke, M. Synthesis—a synthetic spatial information system for urban and regional analysis: methods and examples. *Environment and planning A* **20**, 1645–1671 (1988).
13. Wong, D. W. The reliability of using the iterative proportional fitting procedure. *The Professional Geographer* **44**, 340–348 (1992).
14. Simpson, L. & Tranmer, M. Combining sample and census data in small area estimates: Iterative proportional fitting with standard software. *The Professional Geographer* **57**, 222–234 (2005).
15. Csiszár, I. I-divergence geometry of probability distributions and minimization problems. *The Annals of Probability* 146–158 (1975).
16. Pukelsheim, F. Biproportional scaling of matrices and the iterative proportional fitting procedure. *Annals of Operations Research* **215**, 269–283 (2014).



17. Gietl, C. & Reffel, F. P. Accumulation points of the iterative proportional fitting procedure. *Metrika* **76**, 783–798 (2013).
18. APM Research Lab. The color of coronavirus: COVID-19 deaths by race and ethnicity in the U.S. (2020). Available at <https://apmresearchlab.org/covid/deaths-by-race>.
19. Buckee, C. O. *et al.* Aggregated mobility data could help fight COVID-19. *Science* **368**, 145 (2020).
20. Klein, B. *et al.* Assessing changes in commuting and individual mobility in major metropolitan areas in the United States during the COVID-19 outbreak (2020). Available at [networkscienceinstitute.org/publications/assessing-changes-in-commuting-and-individual-mobility-in-major-metropolitan-areas-in-the-united-states-during-the-covid-19-outbreak](https://networkscienceinstitute.org/publications/assessing-changes-in-commuting-and-individual-mobility-in-major-metropolitan-areas-in-the-united-states-during-the-covid-19-outbreak).
21. Gao, S., Rao, J., Kang, Y., Liang, Y. & Kruse, J. Mapping county-level mobility pattern changes in the united states in response to covid-19. *SIGSPATIAL Special* **12**, 16–26 (2020).
22. Baicker, K., Dube, O., Mullainathan, S., Devin, P. & Wezerek, G. Is It Safer to Visit a Coffee Shop or a Gym? *The New York Times* (2020). Available at <https://nytimes.com/interactive/2020/05/06/opinion/coronavirus-us-reopen.html>.
23. Galeazzi, A. *et al.* Human Mobility in Response to COVID-19 in France, Italy and UK (2020). Available at [arxiv.org/abs/2005.06341](https://arxiv.org/abs/2005.06341).
24. Chinazzi, M. *et al.* The effect of travel restrictions on the spread of the 2019 novel coronavirus (COVID-19) outbreak. *Science* **368**, 395–400 (2020).
25. Woody, S. *et al.* Projections for first-wave COVID-19 deaths across the US using social-distancing measures derived from mobile phones. *medRxiv* (2020). Available at [doi.org/10.1101/2020.04.16.20068163](https://doi.org/10.1101/2020.04.16.20068163).
26. Fenichel, E. P., Berry, K., Bayham, J. & Gonsalves, G. A cell phone data driven time use analysis of the COVID-19 epidemic. *medRxiv* (2020). Available at [doi.org/10.1101/2020.04.20.20073098](https://doi.org/10.1101/2020.04.20.20073098).
27. Reeves, R. V. & Rothwell, J. Class and COVID: How the less affluent face double risks. *The Brookings Institution* (2020). Available at <https://www.brookings.edu/blog/up-front/2020/03/27/class-and-covid-how-the-less-affluent-face-double-risks/>.
